# Supplementary material for: Wanzlick's equilibrium in tri- and tetraaminoolefins
Source: Royal Society of Chemistry journal article supplement (doi:10.1039/d1qo01320c), 2021-01-01
Supplement: d1qo01320c1.pdf [file d1qo01320c1.pdf]

# Wanzlick's Equilibrium in Tri- and Tetraaminoolefins

## Electronic Supplementary Information (ESI)

Julian Messelberger,<sup>‡a</sup> Manoj Kumar,<sup>‡a</sup> Stephen J. Goodner<sup>a,b</sup>, and Dominik Munz<sup>\*a,b</sup>

*(a) Saarland University*

*Inorganic Chemistry: Coordination Chemistry*

*Campus C4.1, D-66123 Saarbrücken, Germany*

*(b) Friedrich-Alexander Universität Erlangen-Nürnberg*

*Department of Chemistry and Pharmacy: Chair of Inorganic and General*

*Chemistry, Egerlandstraße 1, D-91058 Erlangen, Germany*

### Contents

|                                                                 |            |
|-----------------------------------------------------------------|------------|
| <b>1. General Conditions</b>                                    | <b>S2</b>  |
| <b>2. Synthesis of <sup>Me</sup>4 and Dimerization Kinetics</b> | <b>S3</b>  |
| <b>3. Synthetic Procedures and Spectra</b>                      | <b>S9</b>  |
| <b>4. Sublimation Experiments</b>                               | <b>S15</b> |
| <b>5. Computational Details</b>                                 | <b>S19</b> |
| <b>6. References</b>                                            | <b>S35</b> |

## 1. General Conditions

All reactions were carried out under an atmosphere of dry dinitrogen, either in an MBraun glovebox or using standard Schlenk techniques. NMR spectra were recorded on a Bruker Avance IV 400 NMR spectrometer ( $^1\text{H} = 400.13 \text{ MHz}$ ,  $^{13}\text{C} = 100.60 \text{ MHz}$ ). The solvent residual signals were used as an internal reference for the  $^1\text{H}$  NMR and  $^{13}\text{C}$  NMR spectra.  $^1\text{H}$  NMR multiplicities are abbreviated as follows: d, doublet; dd, doublet of doublet; t, triplet; q, quartet; spt, septet; m, multiplet. All coupling constants  $J$  are given in Hz. Solvents were purified using a two-column solid-state purification system (MBraun; MB-SPS 5 / 7, Garching, Germany) and degassed prior to use. Pentane, Hexane, toluene, and benzene were stored over a mirror of potassium; all other solvents were stored over activated molecular sieves. Deuterated NMR solvents were obtained dry and packaged under argon and stored over activated molecular sieves or a mirror of potassium ( $\text{C}_6\text{D}_6$ ). Benzimidazolium salt **Me8**<sup>1</sup> and heterodimer salt **Me9**<sup>2</sup> and olefin **Me10**<sup>2</sup> were synthesized according to literature procedures. Cyclic iminium salt **Et16** was synthesized by hydroiminiumation and subsequent salt metathesis using  $\text{NaBF}_4$  in water.<sup>3, 4</sup> Imidazolinium salt **Me11** was synthesized as described in the literature but using  $\text{NH}_4\text{PF}_6$  instead of  $\text{NH}_4\text{BF}_4$ .<sup>5</sup>

## 2. Synthesis of <sup>Me</sup>4 and Dimerization Kinetics

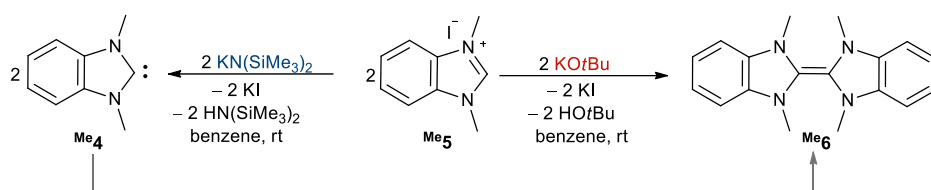

**Scheme S1.** The deprotonation of benzimidazolium salt <sup>Me</sup>5 by KN(SiMe<sub>3</sub>)<sub>2</sub> and KOtBu

The deprotonation of benzimidazolium salt <sup>Me</sup>5 (50 mg; 0.18 mmol; 1.0 eq.) by KOtBu (20 mg; 0.18 mmol; 1.0 eq.) in benzene (0.6 ml) gives dimer <sup>Me</sup>6. Using KN(SiMe<sub>3</sub>)<sub>2</sub> (39 mg; 0.18 mmol; 1.0 eq.) as a base afforded predominantly the free carbene <sup>Me</sup>4 (56%) and the dimer <sup>Me</sup>6 (44%).

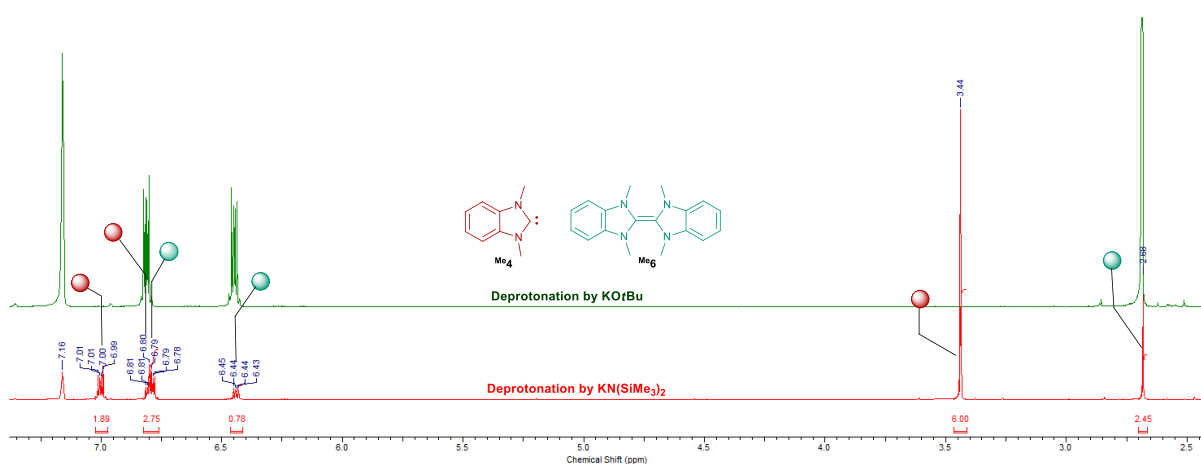

**Figure S1.** <sup>1</sup>H NMR spectra of <sup>Me</sup>4 and <sup>Me</sup>6 (400 MHz; C<sub>6</sub>D<sub>6</sub>) after deprotonation by KN(SiMe<sub>3</sub>)<sub>2</sub> and KOtBu. Spectra were acquired approximately 5 min after the reaction.

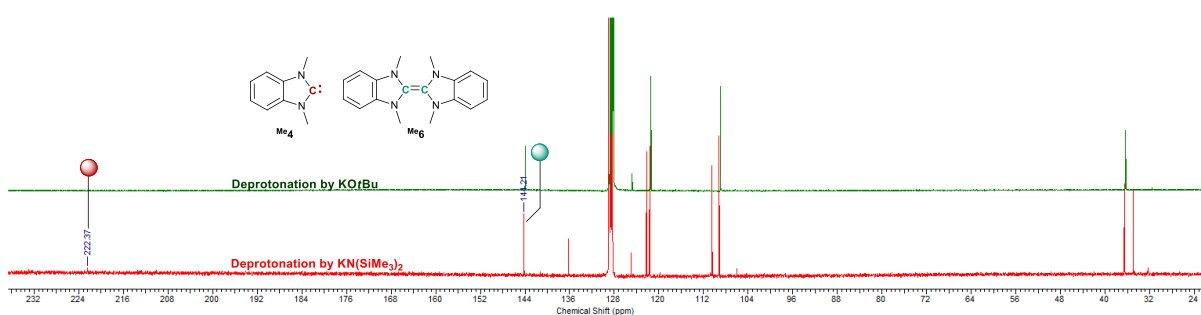

**Figure S2.** <sup>13</sup>C NMR spectra of <sup>Me</sup>4 and <sup>Me</sup>6 (101 MHz; C<sub>6</sub>D<sub>6</sub>) after deprotonation by KN(SiMe<sub>3</sub>)<sub>2</sub> and KOtBu.

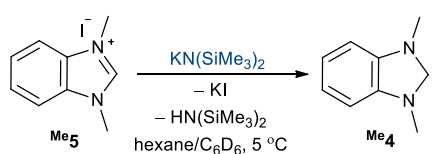

**Scheme S2.** The deprotonation of benzimidazolium salt **Me5** by  $\text{KN}(\text{SiMe}_3)_2$  at 5 °C in a mixture of benzene and hexane.

Benzimidazolium salt **Me5** (6 mg; 0.02 mmol; 0.8 eq.), suspended in 0.5 mL of perdeutero-benzene was added slowly to a solution of  $\text{KN}(\text{SiMe}_3)_2$  (11 mg; 0.05 mmol; 1.0 eq.) in 0.5 hexane at 5 °C. Quantitative deprotonation was obtained after 5 min; the *in-situ*  $^1\text{H}$  NMR spectroscopic analysis revealed the formation of 4% olefin **Me6** after 1 day. Likewise, lyophilizing the mixture and redissolution in  $\text{C}_6\text{D}_6$  indicated 8% dimer formation.

$^1\text{H}$  NMR (400 MHz,  $\text{C}_6\text{D}_6$ )  $\delta$ = 7.03 (dd, 2 H) 6.92 (dd, 2 H) 3.54 (s, 6 H) ppm;  $^{13}\text{C}$  NMR (101 MHz,  $\text{C}_6\text{D}_6$ )  $\delta$ = 218.3 (NCN), 136.3 (ArCN), 122.8 (ArCH), 110.6 (ArCH), 37.4 (NCH<sub>3</sub>) ppm.

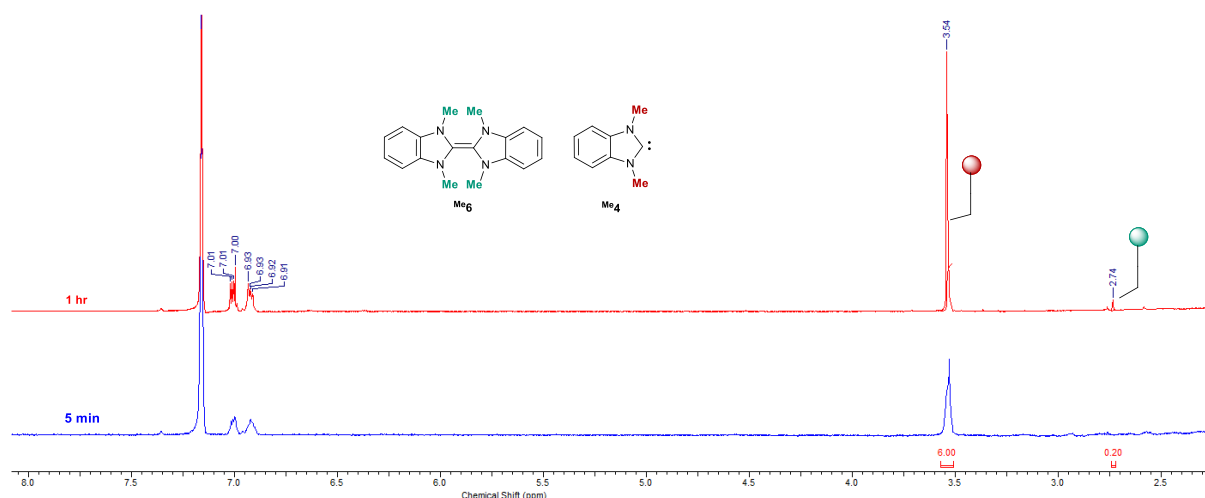

**Figure S3.**  $^1\text{H}$  NMR spectrum of product **Me4** (400 MHz;  $\text{C}_6\text{D}_6$  and hexane) after deprotonation by  $\text{KN}(\text{SiMe}_3)_2$  at 5 °C.

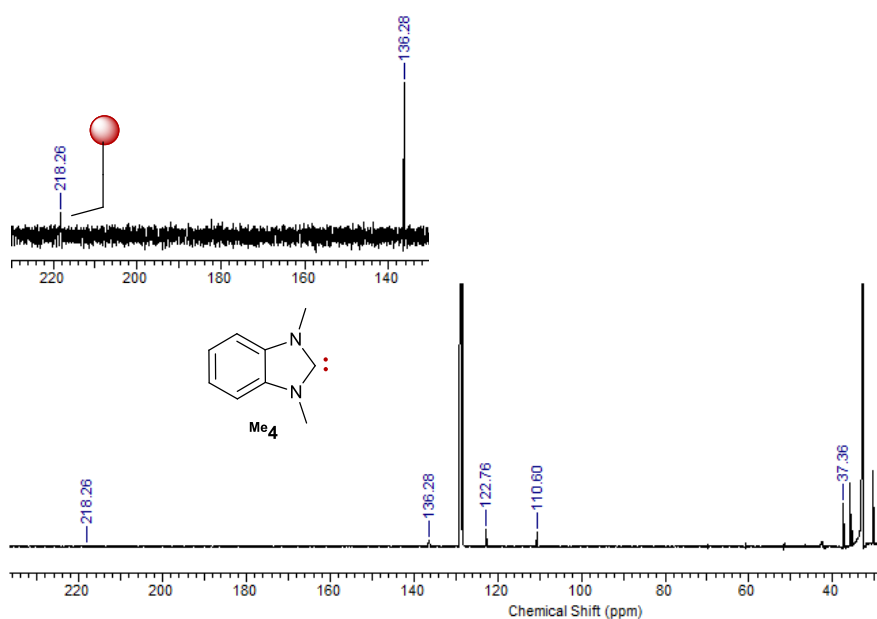

**Figure S4.**  $^{13}\text{C}$  NMR spectrum of product **Me4** (101 MHz;  $\text{C}_6\text{D}_6$  and hexane) after deprotonation by  $\text{KN}(\text{SiMe}_3)_2$  at 5 °C.

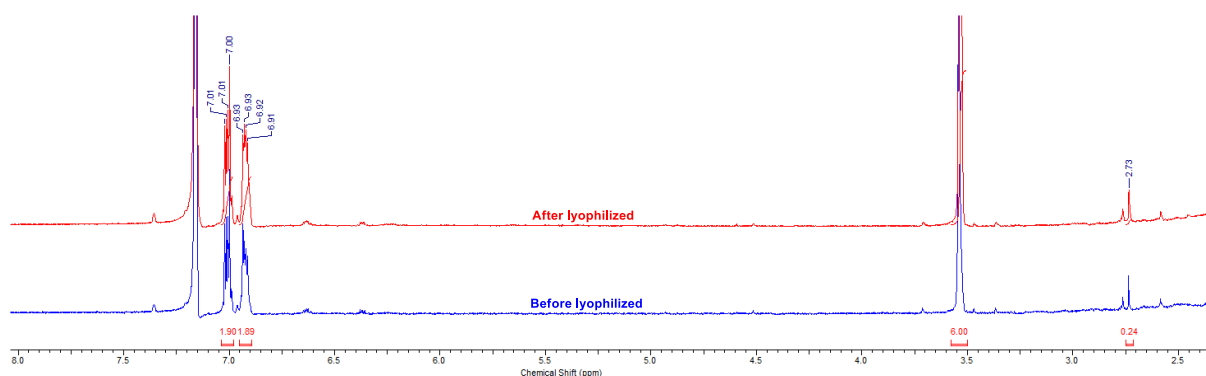

**Figure S5.**  $^1\text{H}$  NMR spectrum of product **Me4** (400 MHz;  $\text{C}_6\text{D}_6$  and hexane) and comparison to spectrum obtained in  $\text{C}_6\text{D}_6$  (400 MHz;  $\text{C}_6\text{D}_6$ ) after lyophilization.

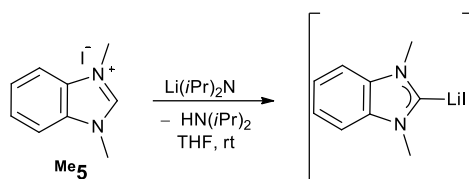

**Scheme S3.** The deprotonation of benzimidazolium salt **Me5** by LDA.

The benzimidazolium salt **Me5** (50 mg; 0.18 mmol; 1.0 eq.) was added slowly to the suspension of LDA (20 mg; 0.18 mmol; 1.0 eq.) in THF (1 mL). After filtration of the reaction mixture, the lithium carbene complex with the concomitant formation of the dimer (13%) was obtained. The lithium complex converted very slowly to the homodimer **Me6** (2% further conversion within 3 days).

$^1\text{H}$  NMR (400 MHz,  $\text{C}_6\text{D}_6$ )  $\delta$  = 6.96 (dd, 2 H) 6.73 (dd, 2 H) 3.72 (s, 6 H) ppm;  $^{13}\text{C}$  NMR (101 MHz,  $\text{C}_6\text{D}_6$ )  $\delta$  = 207.2 (NCN lithium carbene), 135.4 (ArCN), 122.4 (ArCH), 110.5 (ArCH), 50.3 (NCH<sub>3</sub>), 34.9 (NCH<sub>3</sub>) ppm.

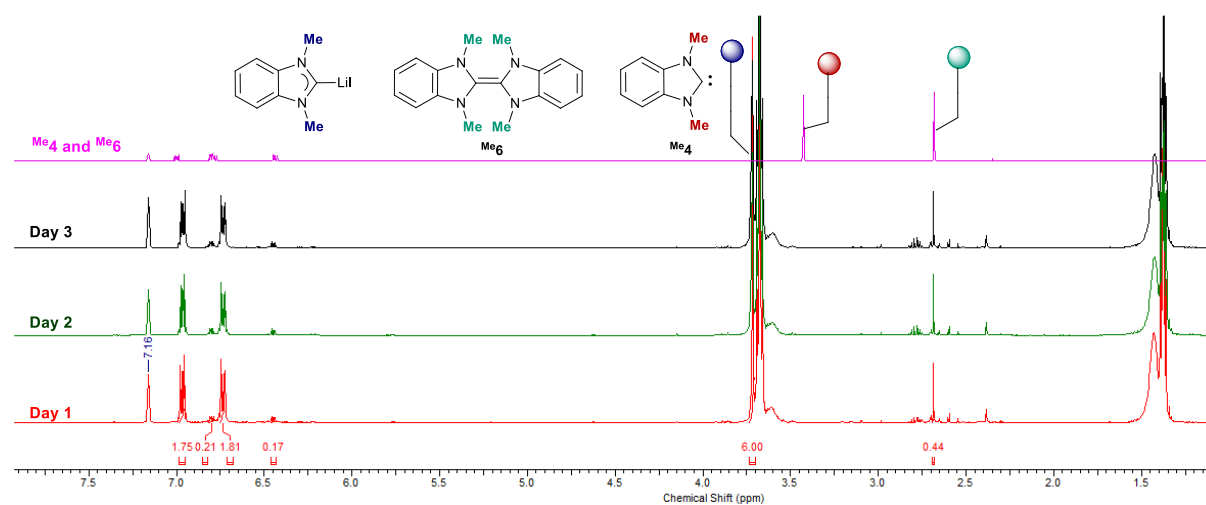

**Figure S6.**  $^1\text{H}$  NMR spectrum of the product mixture (400 MHz;  $\text{C}_6\text{D}_6$ ) obtained after deprotonation by LDA.

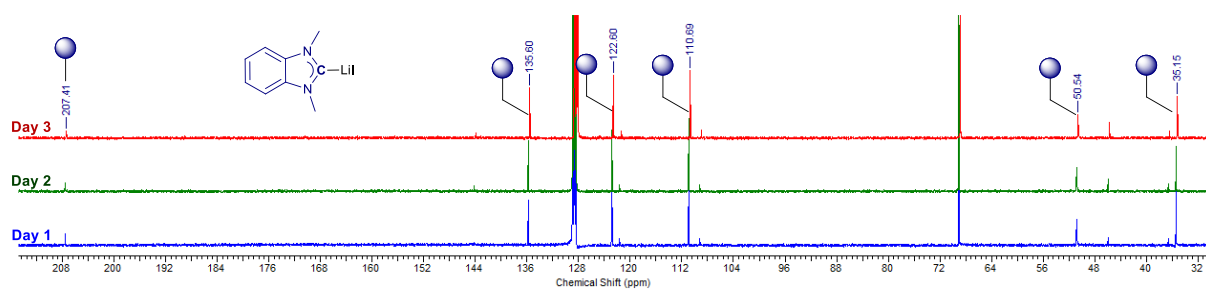

**Figure S7.**  $^{13}\text{C}$  NMR spectrum of product  $\text{Me}_6$  and lithium complex (101 MHz;  $\text{C}_6\text{D}_6$ ) after deprotonation by LDA.

### Kinetic Measurements

A J-Young NMR tube was charged with salt  $\text{Me}_5$  (50 mg, 0.18 mmol, 1.0 eq.) and  $\text{KN}(\text{SiMe}_3)_2$  (39 mg, 0.18 mmol, 1.0 eq.) in  $\text{C}_6\text{D}_6$  (0.6 mL) at room temperature and the composition of the resulting mixture was continuously followed by  $^1\text{H}$  NMR spectroscopy.

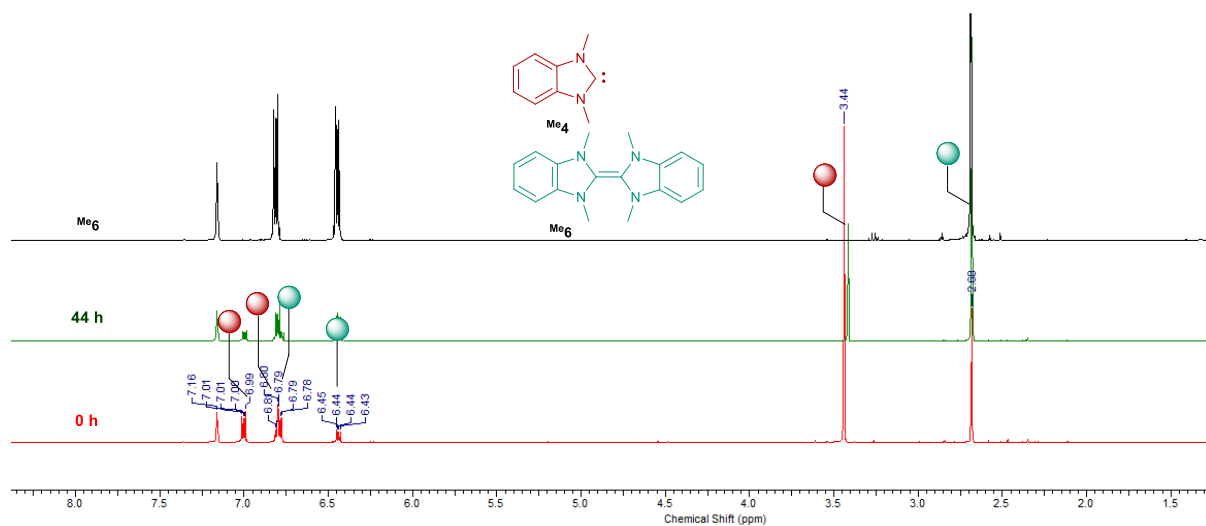

**Figure S8.** Dimerization of  $\text{Me}_4$  to  $\text{Me}_6$  according to  $^1\text{H}$  NMR spectroscopy (400 MHz;  $\text{C}_6\text{D}_6$ ).

| <i>Time</i><br>[h] | $c^{\text{carbene}}$<br>[mmol L <sup>-1</sup> ] | $c^{\ln[\text{carbene}]}$ | $1/c^{\text{carbene}}$<br>[mmol <sup>-1</sup> L] | $c^{\text{dimer}}$<br>[mmol L <sup>-1</sup> ] | $c^{\ln[\text{dimer}]}$ | $1/c^{\text{dimer}}$<br>[mmol <sup>-1</sup> L] |
|--------------------|-------------------------------------------------|---------------------------|--------------------------------------------------|-----------------------------------------------|-------------------------|------------------------------------------------|
| 0                  | 0.71                                            | -0.34                     | 1.40                                             | 0.29                                          | -1.26                   | 3.51                                           |
| 1                  | 0.67                                            | -0.40                     | 1.49                                             | 0.33                                          | -1.11                   | 3.04                                           |
| 2                  | 0.64                                            | -0.45                     | 1.57                                             | 0.36                                          | -1.01                   | 2.75                                           |
| 3                  | 0.61                                            | -0.49                     | 1.64                                             | 0.39                                          | -0.95                   | 2.58                                           |
| 4                  | 0.59                                            | -0.53                     | 1.69                                             | 0.41                                          | -0.89                   | 2.44                                           |
| 5                  | 0.57                                            | -0.56                     | 1.75                                             | 0.43                                          | -0.85                   | 2.34                                           |
| 6                  | 0.55                                            | -0.60                     | 1.80                                             | 0.45                                          | -0.81                   | 2.25                                           |
| 7                  | 0.53                                            | -0.64                     | 1.89                                             | 0.47                                          | -0.76                   | 2.13                                           |
| 8                  | 0.51                                            | -0.67                     | 1.94                                             | 0.49                                          | -0.72                   | 2.06                                           |
| 9                  | 0.50                                            | -0.69                     | 1.97                                             | 0.49                                          | -0.71                   | 2.03                                           |
| 10                 | 0.49                                            | -0.71                     | 2.01                                             | 0.50                                          | -0.69                   | 2.00                                           |
| 11                 | 0.49                                            | -0.73                     | 2.04                                             | 0.51                                          | -0.67                   | 1.96                                           |
| 12                 | 0.47                                            | -0.76                     | 2.10                                             | 0.52                                          | -0.65                   | 1.91                                           |
| 13                 | 0.46                                            | -0.78                     | 2.14                                             | 0.53                                          | -0.63                   | 1.88                                           |
| 14                 | 0.45                                            | -0.80                     | 2.20                                             | 0.54                                          | -0.61                   | 1.84                                           |
| 15                 | 0.44                                            | -0.82                     | 2.25                                             | 0.56                                          | -0.59                   | 1.80                                           |
| 16                 | 0.44                                            | -0.82                     | 2.27                                             | 0.56                                          | -0.58                   | 1.79                                           |
| 17                 | 0.42                                            | -0.85                     | 2.34                                             | 0.57                                          | -0.56                   | 1.75                                           |
| 19                 | 0.41                                            | -0.89                     | 2.42                                             | 0.59                                          | -0.53                   | 1.70                                           |
| 21                 | 0.40                                            | -0.92                     | 2.50                                             | 0.60                                          | -0.51                   | 1.67                                           |
| 23                 | 0.38                                            | -0.97                     | 2.59                                             | 0.61                                          | -0.49                   | 1.63                                           |
| 25                 | 0.37                                            | -0.98                     | 2.67                                             | 0.63                                          | -0.47                   | 1.60                                           |
| 27                 | 0.35                                            | -1.05                     | 2.79                                             | 0.64                                          | -0.44                   | 1.56                                           |
| 29                 | 0.35                                            | -1.05                     | 2.85                                             | 0.65                                          | -0.43                   | 1.54                                           |
| 31                 | 0.34                                            | -1.08                     | 2.91                                             | 0.66                                          | -0.42                   | 1.52                                           |
| 33                 | 0.33                                            | -1.11                     | 2.96                                             | 0.66                                          | -0.41                   | 1.51                                           |
| 35                 | 0.32                                            | -1.14                     | 3.09                                             | 0.68                                          | -0.39                   | 1.48                                           |
| 37                 | 0.31                                            | -1.15                     | 3.16                                             | 0.68                                          | -0.38                   | 1.46                                           |
| 38                 | 0.31                                            | -1.16                     | 3.18                                             | 0.69                                          | -0.38                   | 1.46                                           |
| 40                 | 0.30                                            | -1.20                     | 3.26                                             | 0.69                                          | -0.37                   | 1.44                                           |
| 42                 | 0.29                                            | -1.24                     | 3.40                                             | 0.71                                          | -0.35                   | 1.42                                           |
| 44                 | 0.28                                            | -1.27                     | 3.48                                             | 0.71                                          | -0.34                   | 1.40                                           |

**Table S1.** Evolution of concentrations of carbene <sup>Me</sup>5 and homodimer <sup>Me</sup>6.

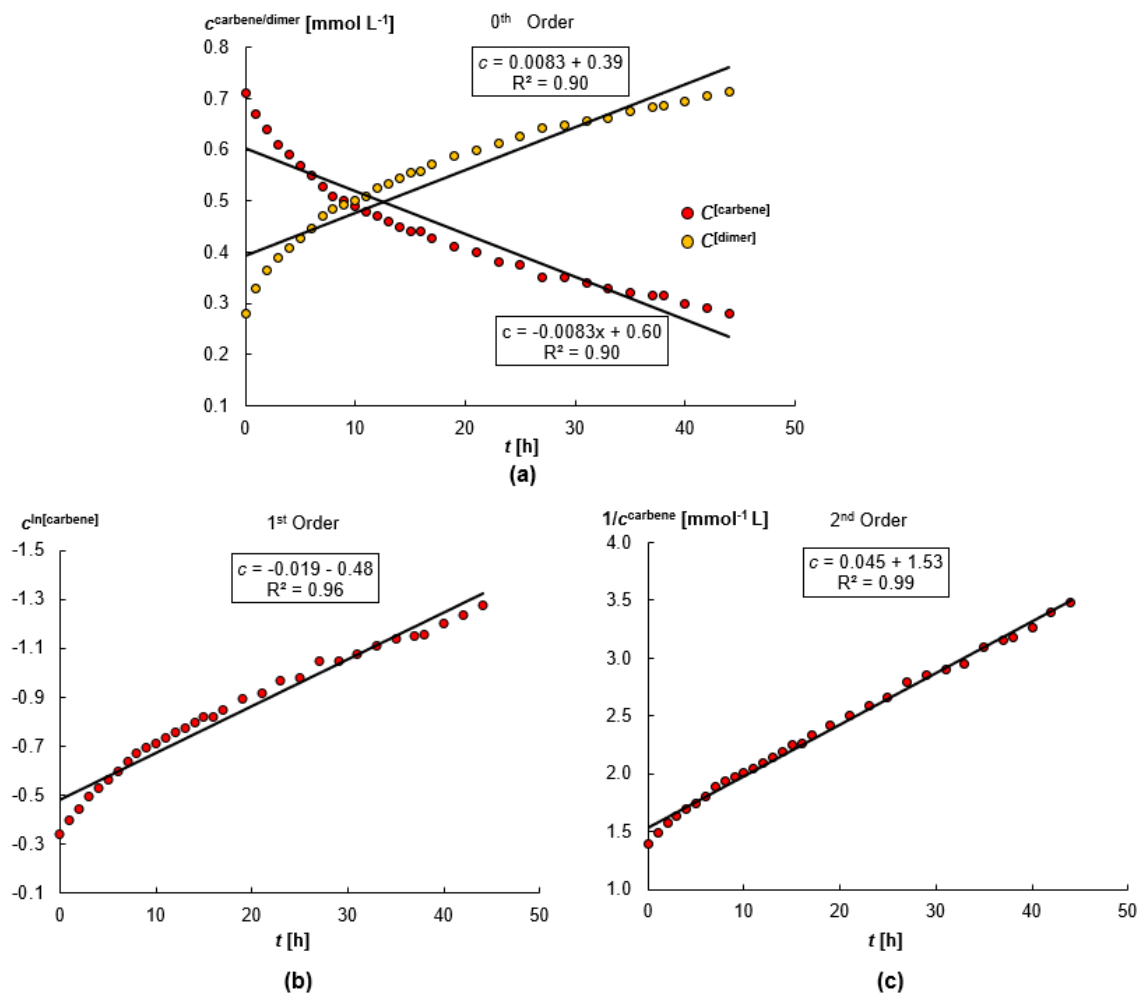

**Figure S9.** Kinetics for dimerization of carbene <sup>Me</sup>5 after deprotonating of benzimidazolium salt <sup>Me</sup>4 by KHMDS. **(a)** Zeroth order kinetic fit; **(b)** First order kinetic fit; **(c)** Second order kinetic fit.



### 3. Synthetic Procedures and Spectra

#### 3.1 *N,N'*-Diethylbenzimidazolium Tetrafluoroborate <sup>Et</sup>8.

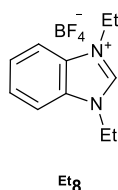

*N,N'*-Diethylbenzimidazolium tetrafluoroborate <sup>Et</sup>8 was synthesized according to a modified literature procedure.<sup>6</sup> In a pressure Schlenk tube, benzimidazole (10.2 g; 86.3 mmol; 1.0 eq.) was suspended in THF (40 mL). KO<sup>t</sup>Bu (9.70 g; 86.3 mmol; 1.0 eq.) in THF (20 mL) was added dropwise. The mixture was stirred for 1 h. Bromoethane (28.2 g; 19.3 mL; 259 mmol; 3.0 eq.) was added dropwise. The suspension was stirred at 100 °C for 1 h. The precipitate was filtered and washed with THF (10 mL). The colorless solid was dissolved in water (150 mL) and NaBF<sub>4</sub> (18.9 g; 173 mmol; 2.0 eq.) dissolved in water (100 mL) was added. A colorless, thick precipitate formed, was filtered off, and washed with water (200 mL) and Et<sub>2</sub>O (100 mL). Drying *in vacuo* gave the colorless product in quantitative yield (22.2 g). The analytical data corresponded to the literature data.<sup>6</sup>

#### 2.2 CAAC–BenzNHC Salt <sup>Et</sup>9

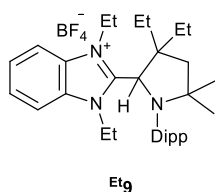

KHMDS (223 mg; 0.11 mmol; 0.9 eq.) was added to the cyclic iminium salt <sup>Et</sup>14 (500 mg; 1.24 mmol; 1.0 eq.) suspended in diethyl ether (10 mL). The suspension turned immediately yellow and became a clear yellow solution over the course of 5 min. After 15 min, a fine precipitate of KBF<sub>4</sub> was observed. The reaction mixture was filtered, and volatiles were removed *in vacuo*. The yellow residue was dissolved in THF (20 mL), and 1,3-diethyl-benzimidazolium tetrafluoroborate (210 mg; 0.80 mmol; 0.8 eq.) was added. The reaction mixture was stirred overnight, during which a colorless, thick precipitate formed. The product was filtered off and washed with diethyl ether (3 × 10 mL). Drying *in vacuo* gave the colorless product in 61% yield (355 mg). <sup>1</sup>H NMR (400 MHz, DMSO-*d*<sub>6</sub>) δ = 8.15 (d, *J* = 8.2 Hz, 1 H), 7.97 (d, *J* = 8.2 Hz, 1 H), 7.61 – 7.74 (m, 2 H), 7.31 (d, *J* = 7.7 Hz, 1 H), 7.21 (t, *J* = 7.6 Hz, 1 H), 6.99 (d, *J* = 7.7 Hz, 1 H), 5.16 (s, 1 H), 4.91 (m, *J* = 14.2, 6.8 Hz, 1 H), 4.55 (m, *J* = 14.9, 7.2 Hz, 1 H), 4.27 – 4.40 (m, 1 H), 3.59 (t, *J* = 6.3 Hz, 2 H), 3.49 (sept, *J* = 13.0, 6.6 Hz, 1 H), 3.24 (sept, *J* = 13.5, 6.7 Hz, 1 H), 2.40 (dd, 2 H), 2.03 – 2.09 (m, *J* = 14.6, 7.1 Hz, 1 H), 1.81 (t, *J* = 6.9 Hz, 3 H), 1.38 (d, *J* = 6.6 Hz, 3 H), 1.36 (s, 3 H), 1.32 (d, *J* = 7.4 Hz, 2 H), 1.29 (d, *J* = 6.3 Hz, 3 H), 1.25 (s, 3 H), 1.08 (d, *J* = 6.6 Hz, 3 H), 1.01

– 1.06 (m, 3 H), 0.71 (t,  $J = 7.1$  Hz, 3 H), 0.56 (t,  $J = 7.0$  Hz, 3 H), –0.16 (d,  $J = 6.9$  Hz, 3 H) ppm;  $^{13}\text{C}$  NMR (101 MHz, DMSO- $d_6$ )  $\delta = 151.6$ , (NCN), 150.9 (ArC Dipp), 149.5 (ArC Dipp), 136.2 (ArC Dipp), 131.4 (ArC Dipp), 130.2 (ArC Dipp), 128.3 (ArCH), 127.5 (ArCH), 127.1 (ArCH), 126.2 (ArCH), 124.9 (ArCH), 114.8 (CCN), 113.8, 70.9 ( $\text{C}_{quat}$ ), 67.06 ( $\text{CH}_2$  pyrrolidine), 66.1 ( $\text{CH}_2$  pyrrolidine), 51.1 ( $\text{NCH}_2$  benzimidazoline), 50.3 ( $\text{NCH}_2$  benzimidazoline), 42.9 ( $\text{C}_{quat}$ ), 40.9 ( $\text{C}_{quat}$ ), 31.1, 30.7 ( $\text{NCH}_2$  pyrrolidine), 30.2 ( $\text{NCH}_2$  pyrrolidine), 27.5, 26.9, 25.7 ( $\text{CH}(\text{CH}_3)_2$  *i*Pr), 25.1 ( $\text{CH}(\text{CH}_3)_2$  *i*Pr), 24.9 ( $\text{CH}(\text{CH}_3)_2$  *i*Pr), 23.8 ( $\text{CH}(\text{CH}_3)_2$  *i*Pr), 14.7 ( $\text{NCH}_2\text{CH}_3$  benzimidazoline), 13.5 ( $\text{NCH}_2\text{CH}_3$  benzimidazoline), 9.4 ( $\text{CCH}_2\text{CH}_3$  pyrrolidine), 8.3 ( $\text{CCH}_2\text{CH}_3$  pyrrolidine) ppm. **M.p.:** 148 – 150 ° C (decomp.) **UHR ESI-MS:**  $m/z$  calculated for  $[\text{C}_{33}\text{H}_{50}\text{N}_3]^+$ ,  $[\text{M}^+]$ , 488.3999, found 488.4003.

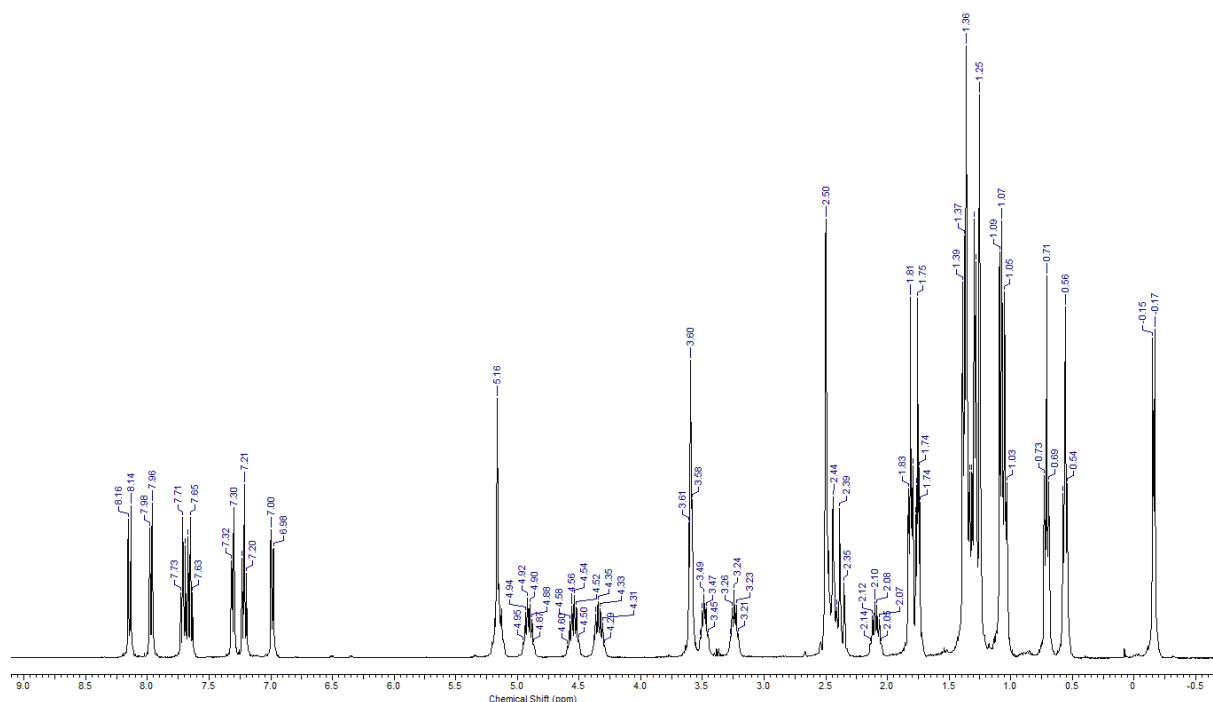

Figure S10.  $^1\text{H}$  NMR spectrum of  $\text{Et}^9$  (400 MHz; DMSO- $d_6$ ).

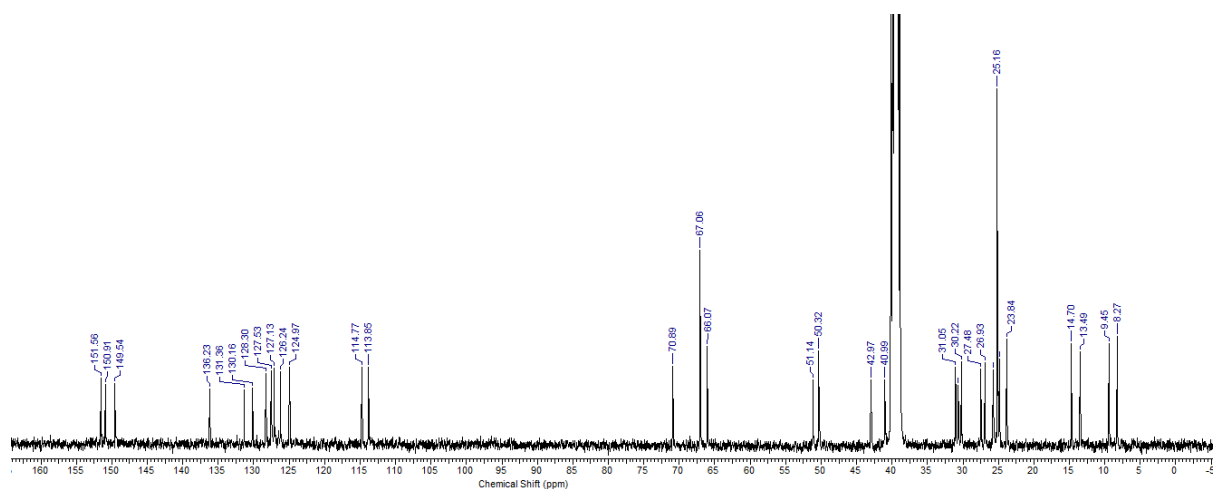

Figure S11.  $^{13}\text{C}$  NMR spectrum of  $\text{Et}^9$  (101 MHz; DMSO- $d_6$ ).

### 2.3 CAAC=BenzNHC Olefin <sup>Et</sup>10

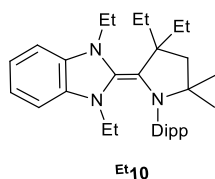

CAAC–benzNHC salt <sup>Et</sup>9 (160 mg, 0.3 mmol; 1 eq.) was suspended in benzene (10 mL). KHMDS (50 mg, 0.25 mmol; 0.9 eq.) was added. After 15 min, a fine precipitate of KBF<sub>4</sub> was observed, which was filtered off. Volatiles were removed *in vacuo*, and the product was washed with hexane and drying *in vacuo* afforded the colorless solid in 80% yield (113 mg).

<sup>1</sup>H NMR (400 MHz, C<sub>6</sub>D<sub>6</sub>) δ = 7.16 – 7.23 (m, 2 H), 7.14 (d, *J* = 2.4 Hz, 1 H), 7.05 (dd, *J* = 7.6, 1.0 Hz, 1 H), 6.88 – 6.93 (m, 1 H), 6.78 – 6.83 (m, 1 H), 6.68 (dd, *J* = 7.6, 0.9 Hz, 1 H), 3.47 (m, *J* = 13.4, 6.7 Hz, 2 H), 2.91 (q, *J* = 7.2 Hz, 2 H), 2.26 – 2.37 (m, 2 H), 2.06 – 2.17 (m, 2 H), 1.96 (d, *J* = 5.4 Hz, 2 H), 1.85 (s, 2 H), 1.42 (d, *J* = 6.7 Hz, 6 H), 1.29 (m, 3 H), 1.28 (s, 3 H), 1.25 – 1.28 (m, 6 H), 1.12 (s, 6 H), 1.04 (t, *J* = 7.5 Hz, 6 H), 0.61 (t, *J* = 7.1 Hz, 3 H) ppm; <sup>13</sup>C NMR (101 MHz, C<sub>6</sub>D<sub>6</sub>) δ = 150.1 (NCN), 147.4 (ArC Dipp), 145.6 (ArC Dipp), 143.8 (ArC Dipp), 141.1 (ArC Dipp), 127.6 (ArCN), 124.9 (ArCH), 123.3 (ArCH), 116.0 (ArCH), 114.3 (CCN), 63.4 (C<sub>quat</sub>), 54.9 (NCH<sub>2</sub> benzimidazole), 50.6 (C<sub>quat</sub>), 46.8 (NCCH<sub>2</sub> pyrrolidine), 46.5 (CCH<sub>2</sub>CH<sub>3</sub> pyrrolidine), 32.5 (CH(CH<sub>3</sub>)<sub>2</sub> *i*Pr), 30.1 (CH(CH<sub>3</sub>)<sub>2</sub> *i*Pr), 28.7 (NCCH<sub>3</sub> pyrrolidine), 25.8 (CH(CH<sub>3</sub>)<sub>2</sub> *i*Pr), 25.1 (CH(CH<sub>3</sub>)<sub>2</sub> *i*Pr), 15.6 (NCH<sub>2</sub>CH<sub>3</sub> benzimidazole), 13.3 (NCH<sub>2</sub>CH<sub>3</sub> benzimidazole) 10.7 ppm. **M.p.:** 161 – 163 ° C; **UHR ESI–MS:** *m/z* calculated for [C<sub>33</sub>H<sub>49</sub>N<sub>3</sub>]<sup>+</sup>, [M<sup>+</sup>] 487.3921, found 487.3906.

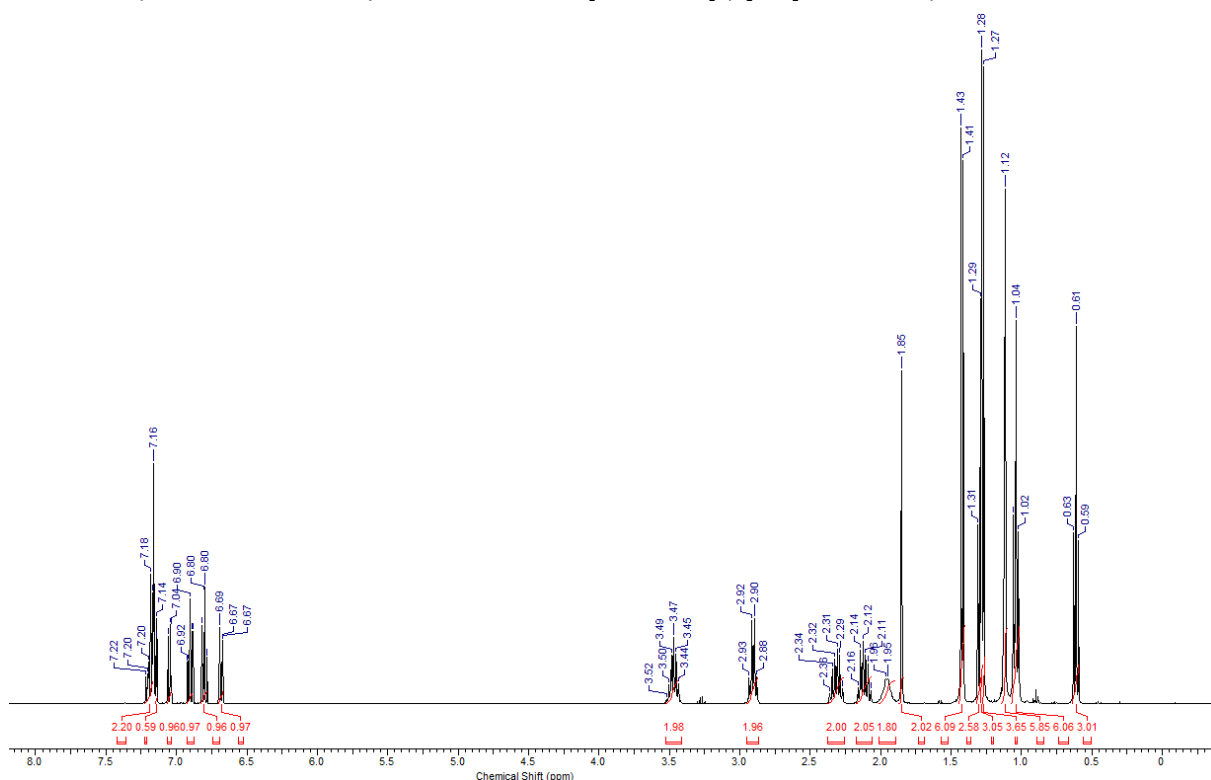

**Figure S12.** <sup>1</sup>H NMR spectrum of <sup>Et</sup>10 (400 MHz; C<sub>6</sub>D<sub>6</sub>).

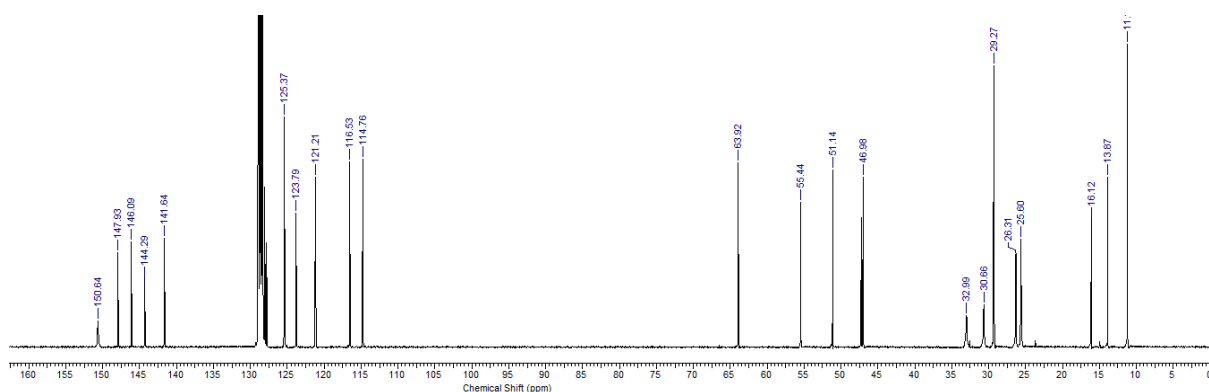

**Figure S13.**  $^{13}\text{C}$  NMR spectrum of **Et10** (101 MHz;  $\text{C}_6\text{D}_6$ ).

## 2.4 saNHC–BenzNHC Salt **Me12**

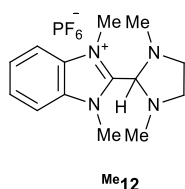

1,3-Dimethyl-benzimidazolium iodide **Me5** (500 mg; 0.18 mmol; 1.0 eq.) was suspended in diethyl ether (7 mL). KHMDS (328 mg; 0.16 mmol; 0.9 eq.) was added. The suspension turned immediately yellow. After 15 min, a fine precipitate of KI was observed, which was filtered off. All volatiles were removed *in vacuo*, and the residue was dissolved in THF (20 mL). 1,3-dimethyl-imidazolium hexafluorophosphate (445 mg; 0.18 mmol; 0.9 eq) was added, and the reaction was stirred for 1 h. The product was filtered off and washed with diethyl ether (15 ml). Drying *in vacuo* gave the colorless product in 65% yield (509 mg) as a mixture with **Me8** (15%) and **Me11** (5%). Repeated crystallization, as well as redissolution in various solvents (DMSO- $d_6$ ,  $\text{CDCl}_3$ ,  $\text{CD}_3\text{CN}$ , pyridine- $d_5$ ) always indicated the presence of the imidazolium (**Me11**)/benzimidazolium salts (**Me8**). The same was observed *in-situ* when performing the reaction in DMSO- $d_6$  (Fig. S14).  $^1\text{H}$  NMR (400 MHz, DMSO- $d_6$ )  $\delta$  = 8.06 (dd,  $J$  = 6.2, 3.1 Hz, 2 H), 7.72 (dd,  $J$  = 4,  $J$  = 3 Hz, 2 H), 4.62 (s, 1 H), 4.19 (s, 6H), 3.37 – 3.42 (m, 2 H), 2.72 – 2.78 (m, 2 H), 2.36 (s, 6 H) ppm;  $^{13}\text{C}$  NMR (101 MHz, DMSO- $d_6$ )  $\delta$  = 148.9 (NCN benzimidazoline), 132.1 (ArCN), 126.7 (ArCH), 113.4 (NCN imidazolidine), 81.1, 53.6 ( $\text{CH}_2$  imidazolidine backbone), 33.7 (NCH<sub>3</sub> imidazolidine), 32.2 (NCH<sub>3</sub> benzimidazoline) ppm. **M.p.**: 190 – 195 °C (mixture; decomp.).

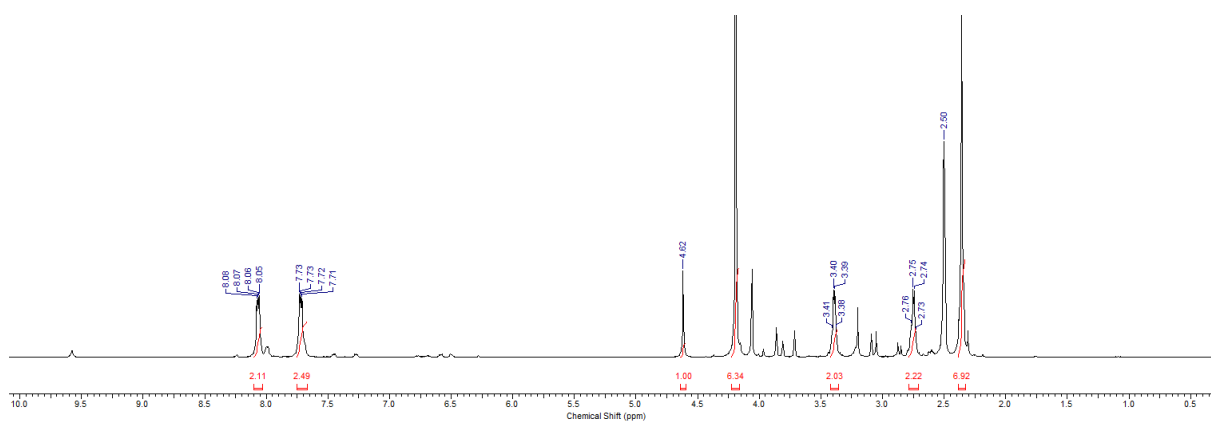

**Figure S14.**  $^1\text{H}$  NMR spectrum of **Me12** (400 MHz;  $\text{DMSO-}d_6$ ).

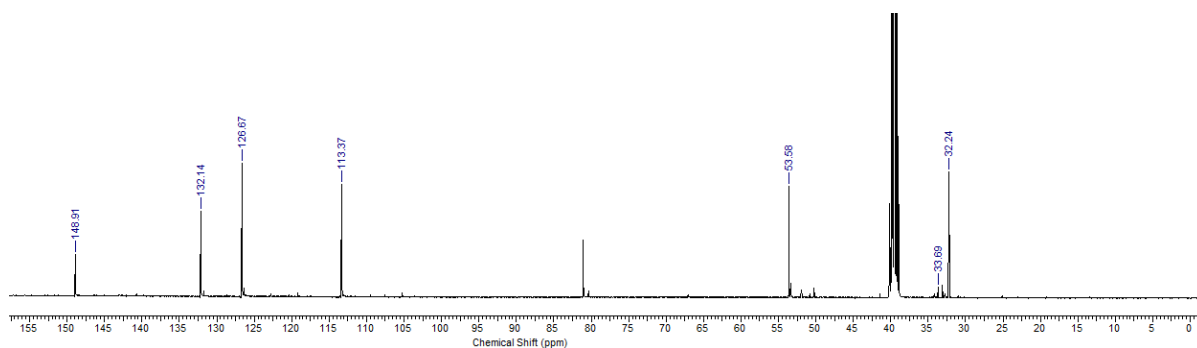

**Figure S15.**  $^{13}\text{C}$  NMR spectrum of **Me12** (101 MHz;  $\text{DMSO-}d_6$ ).

## 2.5 saNHC=BenzNHC Olefin **Me13**

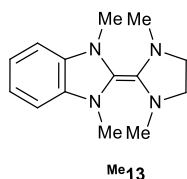

saNHC–BenzNHC salt **Me12** (100 mg; 0.25 mmol; 1.0 eq.) was suspended in benzene (10 mL) and KHMDS (41 mg; 0.2 mmol; 0.8 eq.) was added. After 15 min, a fine precipitate of  $\text{KPF}_6$  was observed, which was filtered off. Drying *in vacuo* gave a yellow, viscous oil, which was triturated with hexane. A fine yellow powder was obtained after lyophilization with benzene in 92% yield (68 mg).  $^1\text{H}$  NMR (400 MHz,  $\text{C}_6\text{D}_6$ )  $\delta$  = 6.81 (dd,  $J$  = 5.5, 3.1 Hz, 2 H) 6.41 (dd,  $J$  = 5.5, 3.1 2 H) 3.09 (s, 6 H) 2.63 (s, 4 H) 2.30 (s, 6 H) ppm;  $^{13}\text{C}$  NMR (101 MHz,  $\text{C}_6\text{D}_6$ )  $\delta$  = 141.9 (NCN benzimidazoline), 129.9 (ArCN), 123.1 (ArCH benzimidazoline), 120.0 (ArCH benzimidazoline), 106.1 (NCN imidazolidine), 51.5 ( $\text{CH}_2$  imidazolidine backbone), 41.9 ( $\text{NCH}_3$  imidazolidine), 33.3 ( $\text{NCH}_3$  benzimidazoline) ppm. **M.p.:** 42 – 44 °C; **UHR ESI–MS:**  $m/z$  calculated for  $\text{C}_{14}\text{H}_{21}\text{N}_4^+$ ,  $[\text{M}+\text{H}]^+$  245.1760, found. 245.1759.

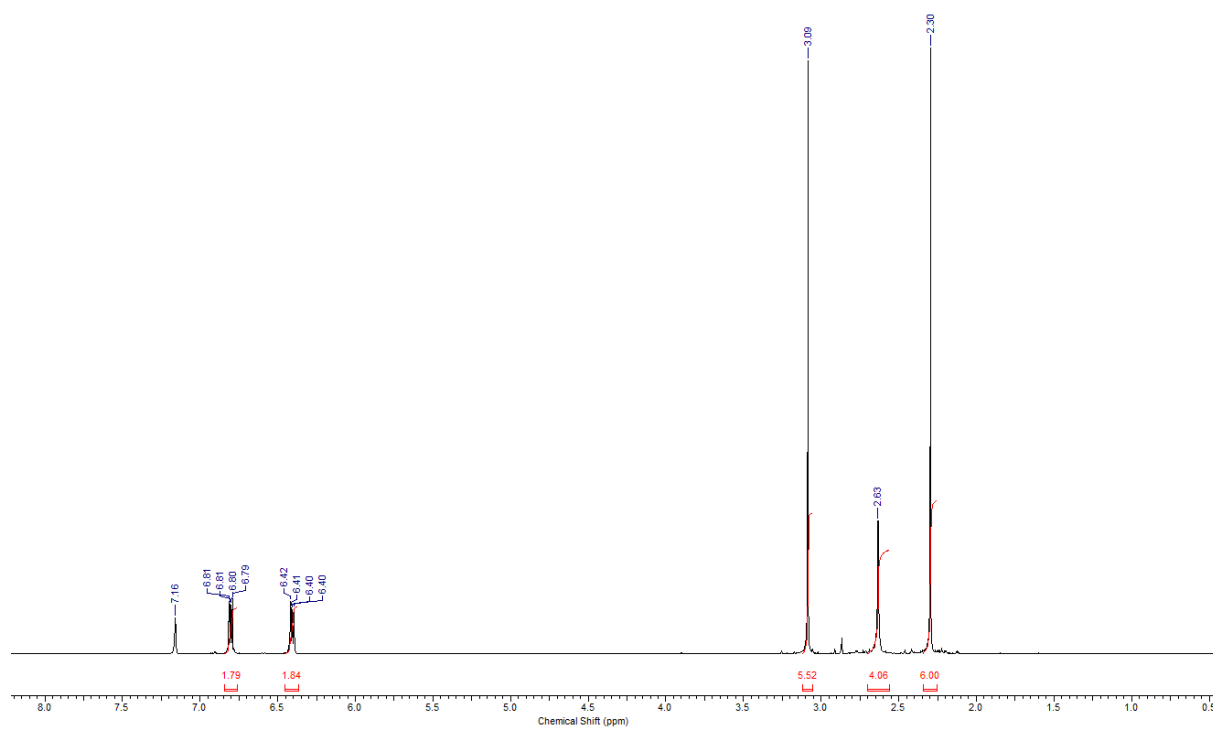

**Figure S16.**  $^1\text{H}$  NMR spectrum of **Me13** (400 MHz;  $\text{C}_6\text{D}_6$ ).

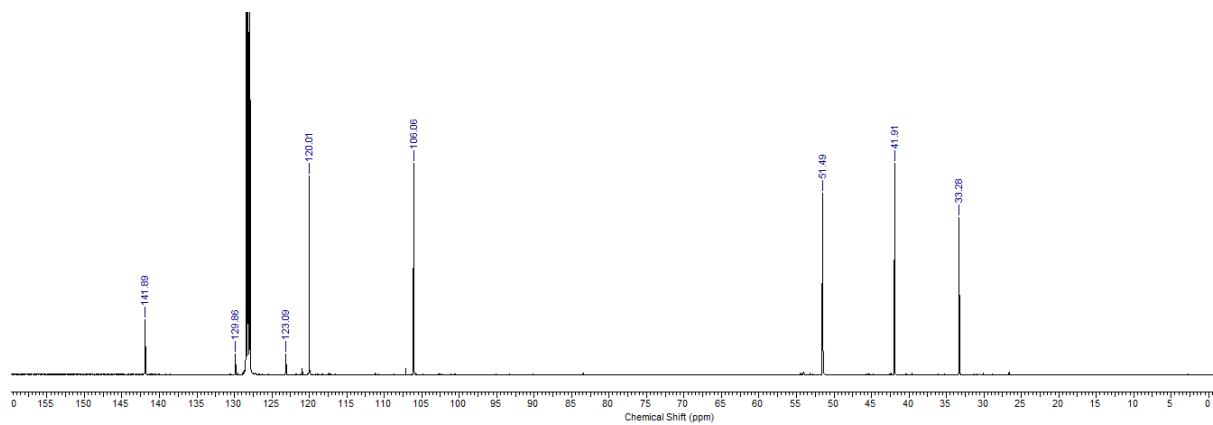

**Figure S17.**  $^{13}\text{C}$  NMR spectrum of **Me13** (101 MHz;  $\text{C}_6\text{D}_6$ ).

## 4. Sublimation Experiments

### 4.1 Sublimation of CAAC–BenzNHC Salt **Et9**

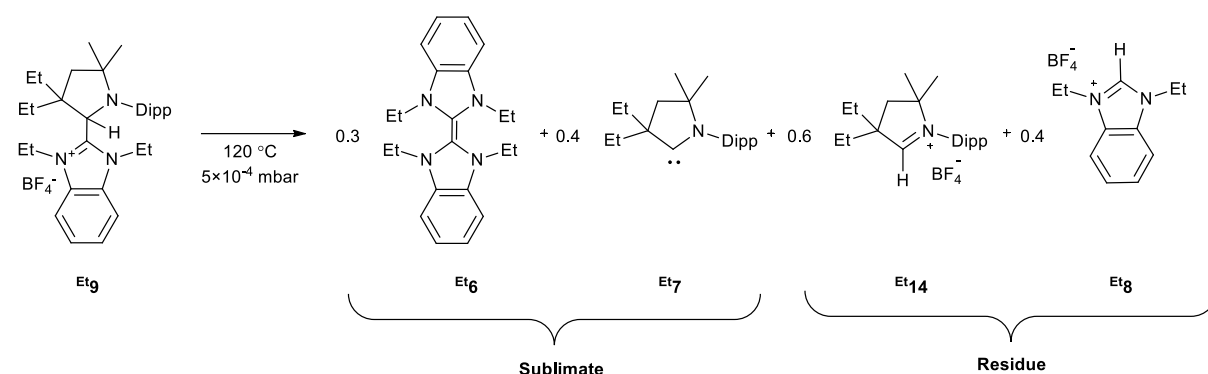

Dissociation of the adduct **Et9** (50 mg) was performed in a sublimation flask under heating in an oil bath. The protonated cyclic iminium salt and 1,3-diethyl-benzimidazolium tetrafluoroborate were obtained in the residue, which was off-white to slightly brownish. The homodimer **Et10** crystallized on the sides of the flask wall as a yellow, crystalline material, whereas **Et7** formed a faint yellow, greasy solid.

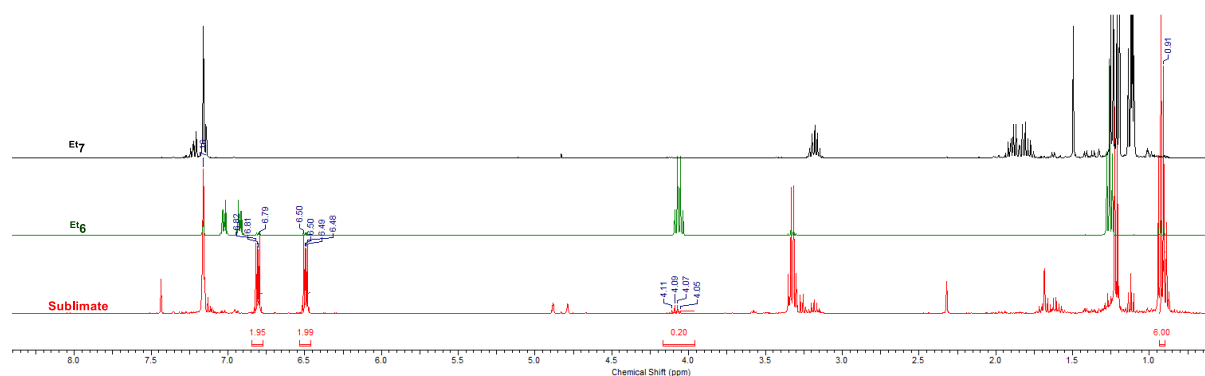

**Figure S18.** Stacked <sup>1</sup>H NMR spectra of sublimed products, **Et6** and **Et7** (400 MHz; C<sub>6</sub>D<sub>6</sub>).

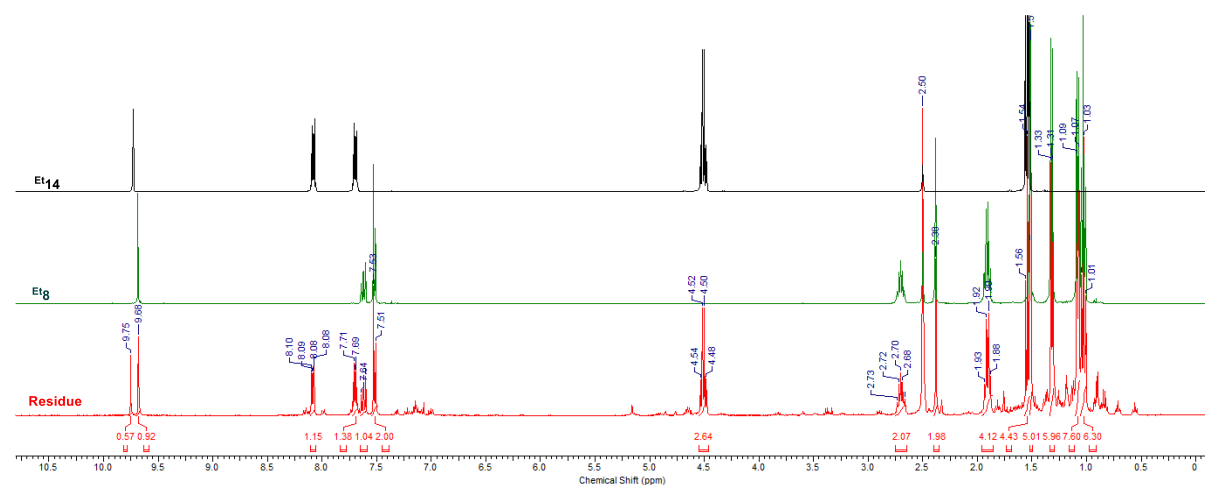

**Figure S19.** Stacked <sup>1</sup>H NMR spectra of residue indicating the concomitant presence of **Et14** and **Et8** (400 MHz; DMSO-*d*<sub>6</sub>).

## 4.2 Sublimation of CAAC=BenzNHC Olefin <sup>Et</sup>10

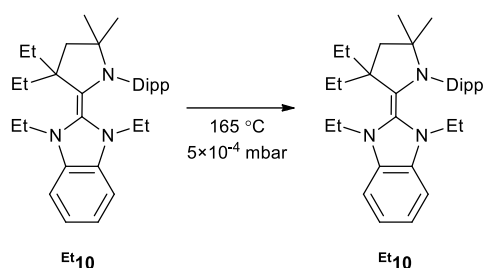

Dissociation of the adduct <sup>Et</sup>10 (50 mg) was performed in a sublimation flask under heating in an oil bath. The homodimer <sup>Et</sup>10 formed as a yellow crystalline material at the flask walls.

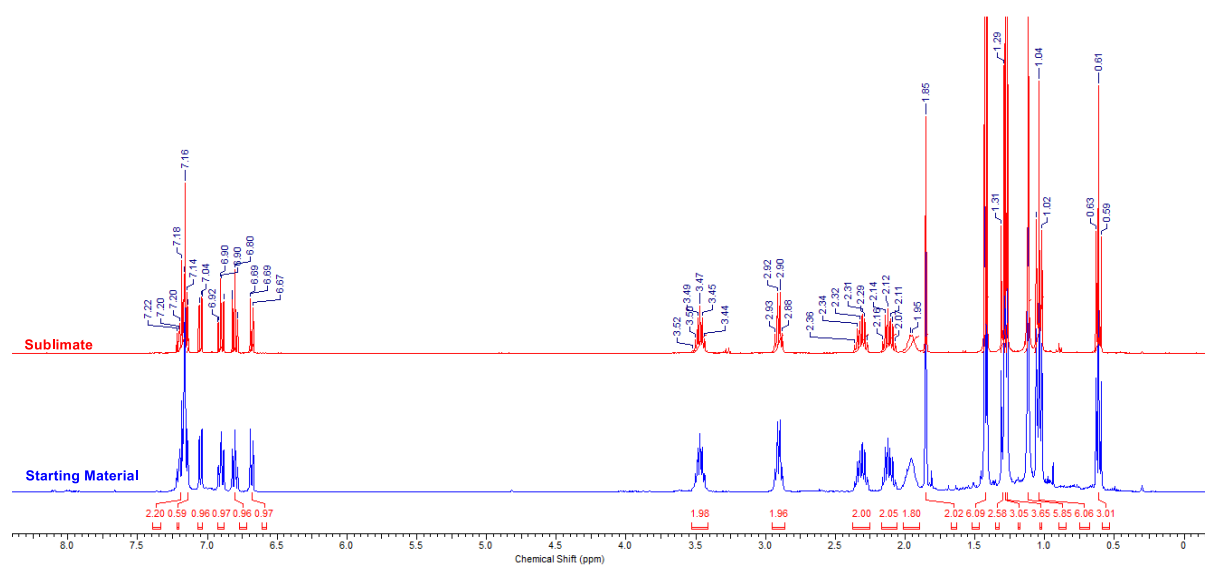

**Figure S20.** Stacked <sup>1</sup>H NMR spectra of <sup>Et</sup>10 before (blue) and after (red) sublimation (400 MHz; C<sub>6</sub>D<sub>6</sub>).

## 4.3 Sublimation of saNHC–BenzNHC Salt <sup>Me</sup>12

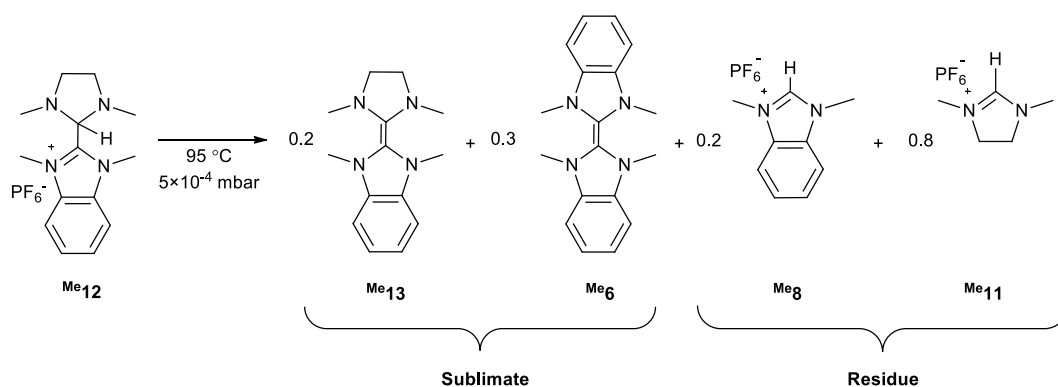

Dissociation of the saNHC-benzNHC <sup>Me</sup>12 (50 mg) was performed in a sublimation flask under heating in an oil bath. The heterodimer <sup>Me</sup>13 and homodimer <sup>Me</sup>6 were obtained as a yellow crystalline material at the flask walls. In addition, the protonated benzNHC salt <sup>Me</sup>8 and saNHC salt <sup>Me</sup>11 were obtained in the colorless residue.



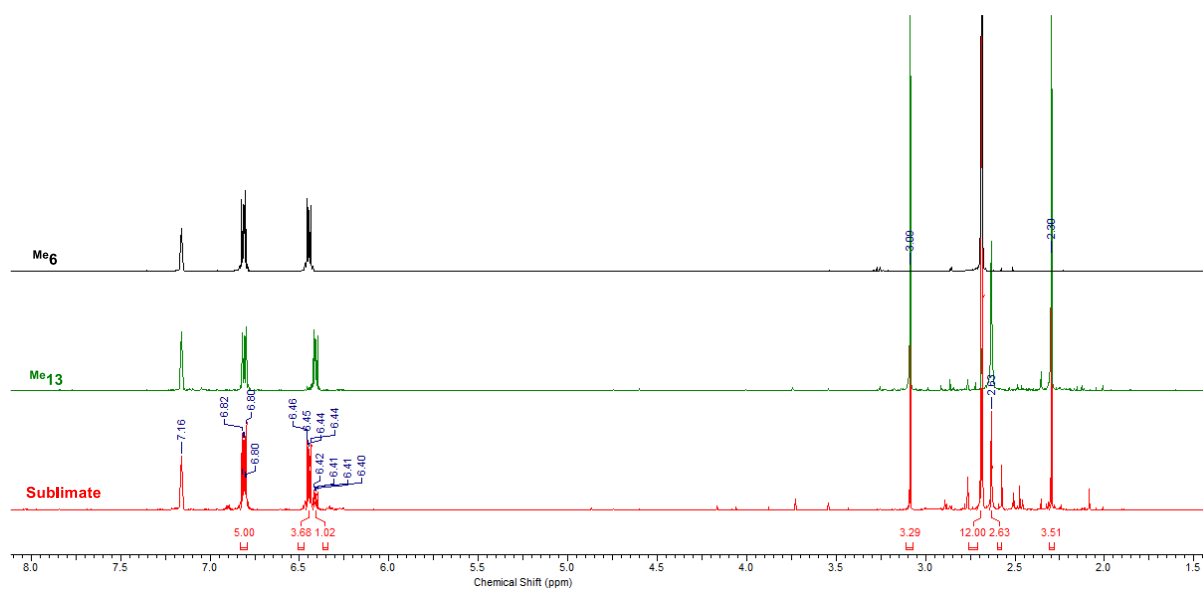

**Figure S21.** Stacked  $^1\text{H}$  NMR spectra of the sublimed products with hetero  $\text{Me}_{13}$  and homodimer  $\text{Me}_6$  (400 MHz;  $\text{C}_6\text{D}_6$ ).

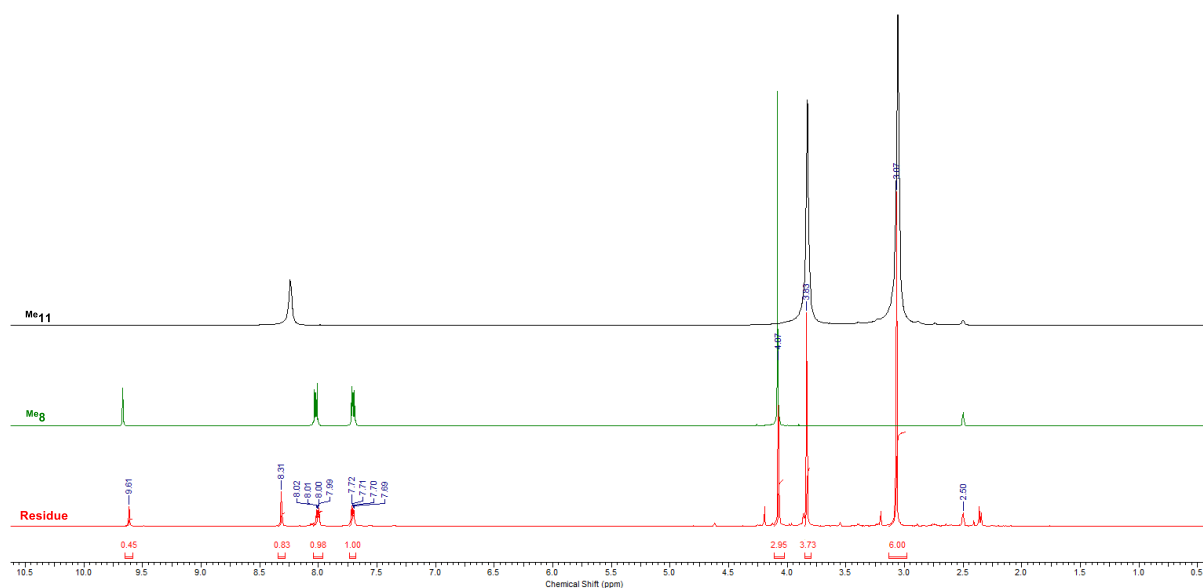

**Figure S22.** Stacked  $^1\text{H}$  NMR spectra of residue, benzNHC  $\text{Me}_8$ , and saNHC salt  $\text{Me}_{11}$  (400 MHz;  $\text{DMSO-}d_6$ ).

#### 4.4 Sublimation of saNHC=BenzNHC Olefin $\text{Me}_{13}$

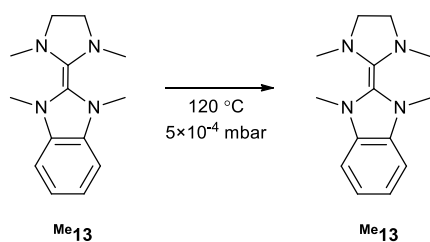

Dissociation of the olefin **Me13** (50 mg) was performed in a sublimation flask under heating in an oil bath. The homodimer **Me13** formed as a yellow crystalline material at the flask walls.

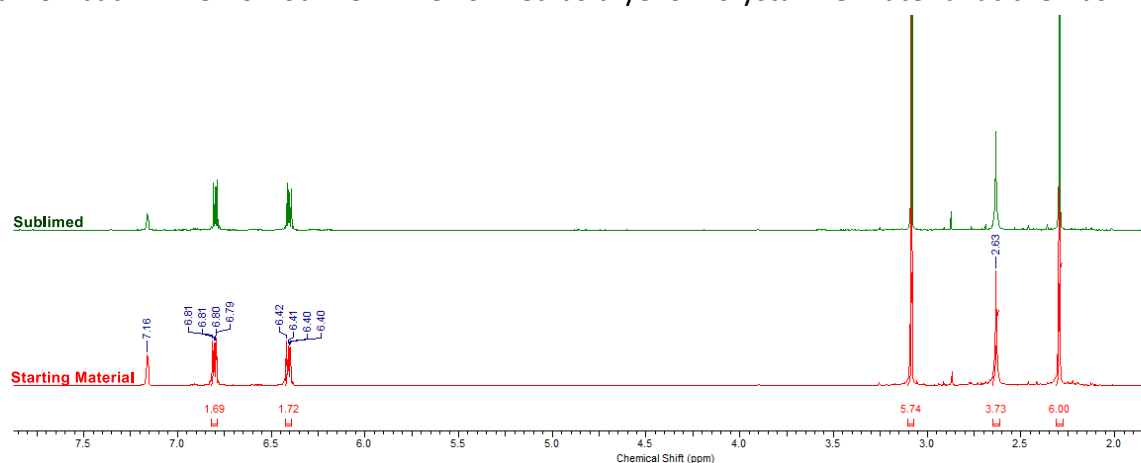

**Figure S23.** Stacked <sup>1</sup>H NMR spectra of **Me13** before (red) and after (green) sublimation (400 MHz; C<sub>6</sub>D<sub>6</sub>).

#### 4.5 Sublimation Crossover Experiment

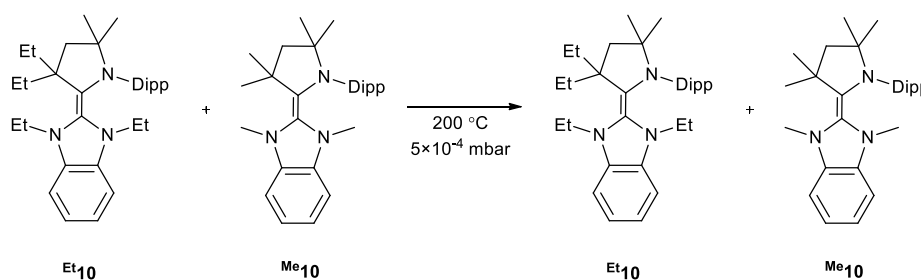

Olefins **Et10** and **Me10** were ground and put mixed in the sublimation flask. Upon slowly elevating the temperature to 185 °C, only the methyl olefin **Me10** sublimed, leaving **Et10** in the residue. However, when the temperature was adjusted rapidly to 200 °C, crystallization along the flask wall was an equal mixture of both dimers, with no crossover products, thus disproving dissociation.

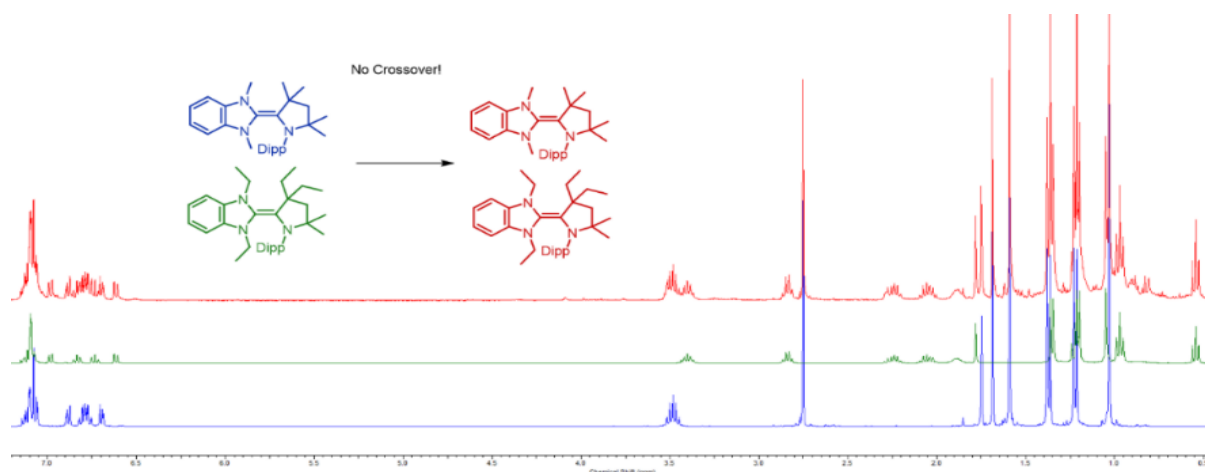

**Figure S24.** Stacked <sup>1</sup>H NMR spectra of starting material (**Me10** and **Et10**) and sublimation of a mixture of the two products (400 MHz; C<sub>6</sub>D<sub>6</sub>).

## 5. Computational Details

The calculations were performed with ORCA v. 4.2.1.<sup>7, 8</sup> All geometric parameters were optimized without constraints at the BLYP-D3BJ/def2-TZVPP level of theory.<sup>9-14</sup> This method was chosen according to previous computational studies,<sup>15, 16</sup> a benchmark with B3LYP<sup>17, 18</sup> and PBEh-3c<sup>19</sup> which revealed an inferior fit with the experimental results, and in sight of difficulties to localize transition states at the double- $\zeta$  level of theory (note the very low imaginary frequencies given below). The RI approximation and the related auxiliary basis set (def2/J)<sup>20</sup> were used to speed up the calculations. Tighter than default convergence criteria were chosen for both the optimization (*tightopt*) of the structural parameters as well as the scf (*tightscf*), and more accurate than default grid values (*Grid6*, *FinalGrid7*) were used. All calculated structures were verified as true minima by the absence ( $N^{\text{imag}} = 0$ ) of negative eigenvalues in the harmonic vibrational frequency analysis, or as first-order transition states ( $N^{\text{imag}} = 1$ ), respectively. The energies of all structures were corrected by single-point calculations at the DLPNO-CCSD(T)<sup>21, 22</sup>/def2-TZVPP<sup>13, 14</sup> level of theory using the def2-TZVPP/C auxiliary basis set<sup>14</sup> and “NormalPNO” settings.<sup>23</sup> Implicit correction for solvation effects (solvent: THF) was conducted with the Conductor-like Continuum Polarization (CPCM) model using point charges according to the Gaussian Charge Scheme with van-der-Waals surface cavities.<sup>24</sup>

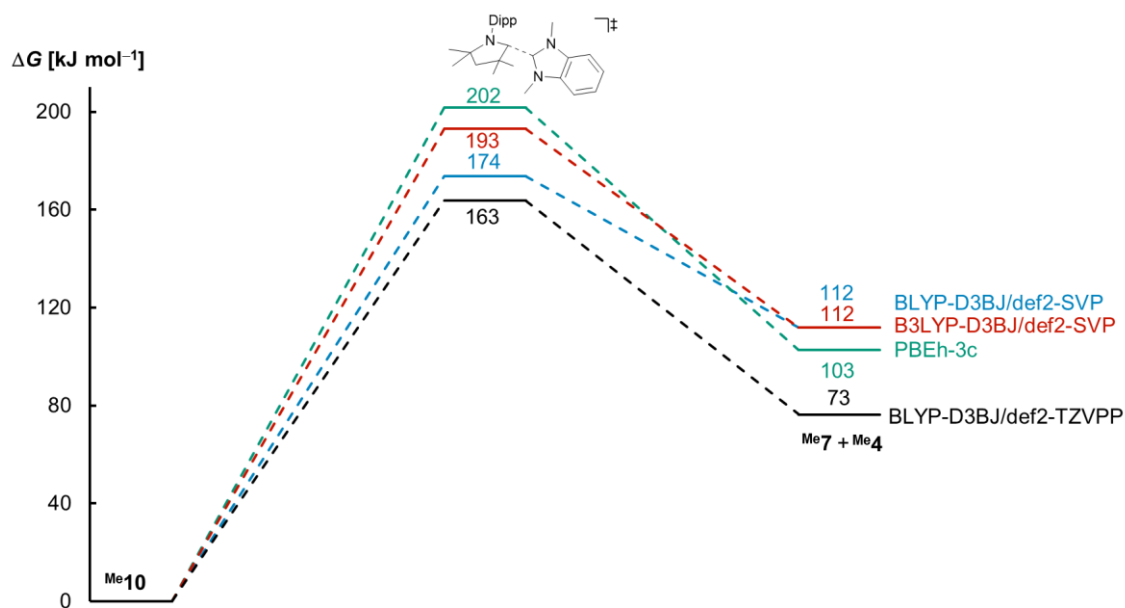

Figure S25. Comparison of functionals.

## Energies

| Basis set<br>Method | $N^{\text{imag}}$          | $\Delta E$            | $\Delta G$            | $\Delta E$                               | $\Delta E$ (GCS=THF)           |
|---------------------|----------------------------|-----------------------|-----------------------|------------------------------------------|--------------------------------|
|                     |                            | def2-TZVPP<br>BLYP-D3 | def2-TZVPP<br>BLYP-D3 | def2-TZVPP<br>DLPNO-<br>CCSD(T)//BLYP-D3 | def2-TZVPP<br>BLYP-D3//BLYP-D3 |
| Me4                 | 0                          | -458.4781009          | -458.3438655          | -457.6247942                             | -458.4881573                   |
| Et4                 | 0                          | -537.0995923          | -536.9128481          | -536.1108755                             | -537.1097636                   |
| Me7                 | 0                          | -835.4776168          | -835.0724658          | -833.9774893                             | -835.4876832                   |
| Et7                 | 0                          | -914.0917649          | -913.6337859          | -912.4564569                             | -914.1012394                   |
| Me9                 | 0                          | -1294.460948          | -1293.87617           | -1292.114774                             | -1294.521121                   |
| TS <sup>Me9</sup>   | 1 (-23 cm <sup>-1</sup> )  | -1294.427083          | -1293.848062          | -1292.069872                             | -1294.48595                    |
| Et9                 | 0                          | -1451.698902          | -1451.006769          | -1449.080462                             | -1451.756602                   |
| TS <sup>Et9</sup>   | 1 (-21 cm <sup>-1</sup> )  | -1451.664576          | -1450.980058          | -1449.035539                             | -1451.722805                   |
| Me10                | 0                          | -1294.014953          | -1293.445420          | -1291.664747                             | -1294.023629                   |
| TS <sup>Me10</sup>  | 1 (-223 cm <sup>-1</sup> ) | -1293.948847          | -1293.383066          | -1291.584952                             | -1293.957621                   |
| Et10                | 0                          | -1451.240853          | -1450.564793          | -1448.619008                             | -1451.249363                   |
| TS <sup>Et10</sup>  | 1 (-159 cm <sup>-1</sup> ) | -1451.182306          | -1450.510629          | -1448.549238                             | -1451.192234                   |
| Me11                | 0                          | -306.4344683          | -306.3074777          | -305.8922493                             | -306.0133097                   |
| Et11                | 0                          | -385.0593026          | -384.8803367          | -384.3810485                             | -384.6336912                   |
| Me12                | 0                          | -764.955858           | -764.667934           | -763.5699874                             | -765.0180989                   |
| TS <sup>Me12</sup>  | 1 (-146 cm <sup>-1</sup> ) | -764.9360313          | -764.6513463          | -763.5375165                             | -764.9971882                   |
| Et12                | 0                          | -922.2035801          | -921.8097057          | -920.5478849                             | -922.2634073                   |
| TS <sup>Et12</sup>  | 1 (-149 cm <sup>-1</sup> ) | -922.1835069          | -921.7922878          | -920.5143034                             | -922.2425731                   |
| Me13                | 0                          | -764.5261582          | -764.2524601          | -763.1347795                             | -764.5333671                   |
| TS <sup>Me13</sup>  | 1 (-292 cm <sup>-1</sup> ) | -764.4776008          | -764.20721            | -763.0758051                             | -764.4872702                   |
| Et13                | 0                          | -921.7656588          | -921.3859613          | -920.1026274                             | -921.7731259                   |
| TS <sup>Et13</sup>  | 1 (-185 cm <sup>-1</sup> ) | -921.7190145          | -921.3431573          | -920.0462436                             | -921.7288595                   |
| Me14                | 0                          | -835.9254664          | -835.5065928          | -834.4232875                             | -835.9882303                   |
| Et14                | 0                          | -914.5422281          | -914.07058            | -912.9043271                             | -914.6037547                   |
| Me15                | 0                          | -306.0039183          | -305.8911377          | -305.4623561                             | -306.0133097                   |
| Et15                | 0                          | -384.6241219          | -384.4594675          | -383.946946                              | -384.6336912                   |

**Table S2.** Electronic ( $\Delta E$ ) and Gibbs free energies ( $\Delta G$ ). All energies are given in [Eh].

## XYZ Coordinates

|                       |          |          |          |                       |           |          |          |  |
|-----------------------|----------|----------|----------|-----------------------|-----------|----------|----------|--|
| <b>Me<sub>4</sub></b> |          |          |          | H                     | -1.02926  | -2.63287 | 3.44413  |  |
| C                     | 0.37100  | -1.69686 | 0.31719  |                       |           |          |          |  |
| C                     | 0.40573  | -0.33384 | -0.05265 |                       |           |          |          |  |
| N                     | -0.86465 | 0.16980  | 0.25356  | <b>Me<sub>7</sub></b> |           |          |          |  |
| N                     | -0.91777 | -1.91587 | 0.81958  | N                     | -7.34590  | 8.11007  | 1.93654  |  |
| C                     | -1.70224 | -0.78281 | 0.79292  | C                     | -6.62402  | 9.50787  | 3.96465  |  |
| C                     | 1.48471  | -2.52356 | 0.14975  | C                     | -4.98245  | 9.03381  | 2.13983  |  |
| C                     | 2.63779  | -1.94660 | -0.39975 | C                     | -7.10448  | 9.74319  | -0.87977 |  |
| C                     | 2.67242  | -0.58831 | -0.76825 | C                     | -9.24940  | 10.45064 | 0.24482  |  |
| C                     | 1.55519  | 0.24117  | -0.60032 | C                     | -8.10109  | 8.31224  | 0.88543  |  |
| H                     | 1.46208  | -3.57265 | 0.43298  | C                     | -7.88628  | 9.76163  | 0.45776  |  |
| H                     | 3.52360  | -2.56045 | -0.54438 | C                     | -6.46519  | 9.29809  | 2.45281  |  |
| H                     | 3.58444  | -0.17441 | -1.19168 | C                     | -7.06937  | 10.44078 | 1.61055  |  |
| H                     | 1.58605  | 1.28937  | -0.88602 | H                     | -9.11956  | 8.48146  | 3.54630  |  |
| C                     | -1.38959 | -3.20184 | 1.32011  | H                     | -5.98189  | 10.33891 | 4.28114  |  |
| H                     | -2.42427 | -3.07131 | 1.64199  | H                     | -7.65308  | 9.75881  | 4.23440  |  |
| H                     | -0.77937 | -3.53379 | 2.16989  | H                     | -4.38115  | 9.87315  | 2.50957  |  |
| H                     | -1.34319 | -3.96436 | 0.53202  | H                     | -4.62947  | 8.12425  | 2.63722  |  |
| C                     | -1.26826 | 1.55331  | 0.03027  | H                     | -4.80158  | 8.93681  | 1.06596  |  |
| H                     | -2.30486 | 1.65169  | 0.35735  | H                     | -7.65971  | 9.18171  | -1.63892 |  |
| H                     | -1.19242 | 1.81138  | -1.03382 | H                     | -6.95332  | 10.76893 | -1.24114 |  |
| H                     | -0.63430 | 2.23928  | 0.60669  | H                     | -6.12061  | 9.27304  | -0.76785 |  |
|                       |          |          |          | H                     | -9.10839  | 11.50197 | -0.04127 |  |
|                       |          |          |          | H                     | -9.81688  | 9.94477  | -0.54400 |  |
| <b>Et<sub>4</sub></b> |          |          |          | H                     | -9.84988  | 10.42312 | 1.16258  |  |
| C                     | 0.43576  | -1.73604 | 0.21966  | H                     | -7.74237  | 11.04087 | 2.23423  |  |
| C                     | 0.49349  | -0.37677 | -0.16218 | H                     | -6.29168  | 11.11164 | 1.22990  |  |
| N                     | -0.74723 | 0.16695  | 0.19894  | C                     | -7.28751  | 6.82041  | 2.60421  |  |
| N                     | -0.83556 | -1.91325 | 0.78337  | C                     | -8.18128  | 6.56656  | 3.66880  |  |
| C                     | -1.58242 | -0.75630 | 0.78751  | C                     | -6.37299  | 5.84347  | 2.15290  |  |
| C                     | 1.51050  | -2.59997 | -0.00984 | C                     | -8.06416  | 5.34557  | 4.34955  |  |
| C                     | 2.64667  | -2.06652 | -0.63179 | C                     | -6.29364  | 4.63826  | 2.86859  |  |
| C                     | 2.70420  | -0.71200 | -1.01225 | C                     | -7.11163  | 4.39848  | 3.97224  |  |
| C                     | 1.62749  | 0.15438  | -0.78351 | H                     | -8.73870  | 5.12573  | 5.17300  |  |
| H                     | 1.47169  | -3.64630 | 0.28113  | H                     | -5.59686  | 3.86991  | 2.54343  |  |
| H                     | 3.50136  | -2.71086 | -0.82343 | H                     | -7.02980  | 3.46061  | 4.51789  |  |
| H                     | 3.60246  | -0.33068 | -1.49197 | C                     | -5.59888  | 5.99875  | 0.84670  |  |
| H                     | 1.67746  | 1.19875  | -1.07978 | H                     | -5.61657  | 7.05205  | 0.56391  |  |
| C                     | -1.31529 | -3.17240 | 1.36050  | C                     | -6.33757  | 5.23238  | -0.27713 |  |
| H                     | -2.40502 | -3.09207 | 1.40111  | C                     | -4.12309  | 5.56622  | 0.94809  |  |
| H                     | -1.05889 | -3.98899 | 0.67230  | H                     | -3.60342  | 6.09561  | 1.75556  |  |
| C                     | -1.11325 | 1.57596  | 0.02728  | H                     | -4.02512  | 4.49008  | 1.13496  |  |
| H                     | -2.20491 | 1.61457  | 0.07637  | H                     | -3.60243  | 5.78300  | 0.00708  |  |
| H                     | -0.80557 | 1.89373  | -0.97797 | H                     | -6.37767  | 4.15805  | -0.05678 |  |
| C                     | -0.48846 | 2.47933  | 1.09936  | H                     | -5.81942  | 5.36682  | -1.23563 |  |
| H                     | -0.83128 | 2.17569  | 2.09479  | H                     | -7.36187  | 5.60683  | -0.37935 |  |
| H                     | 0.60601  | 2.42322  | 1.08061  | C                     | -9.34090  | 7.50699  | 3.98738  |  |
| H                     | -0.78077 | 3.52344  | 0.93335  | H                     | -6.32199  | 8.61703  | 4.52637  |  |
| C                     | -0.73714 | -3.43554 | 2.75784  | C                     | -9.56928  | 7.71760  | 5.49673  |  |
| H                     | -1.11550 | -4.38652 | 3.15232  | C                     | -10.62085 | 6.99122  | 3.28597  |  |
| H                     | 0.35749  | -3.48626 | 2.73421  | H                     | -10.45765 | 6.91869  | 2.20503  |  |

|   |           |         |         |
|---|-----------|---------|---------|
| H | -10.89925 | 5.99934 | 3.66414 |
| H | -11.45966 | 7.67575 | 3.46790 |
| H | -9.89714  | 6.79590 | 5.99212 |
| H | -10.35189 | 8.46955 | 5.65710 |
| H | -8.65597  | 8.06133 | 5.99656 |

**Et7**

|   |          |          |          |
|---|----------|----------|----------|
| C | -7.18799 | 8.43224  | 0.70045  |
| C | -7.24397 | 6.90552  | 0.48480  |
| C | -5.82223 | 8.92194  | 0.10654  |
| H | -7.22341 | 8.65450  | 1.77359  |
| H | -8.04881 | 8.92781  | 0.24071  |
| N | -5.73847 | 6.63995  | 0.16084  |
| C | -4.96011 | 7.67199  | -0.04898 |
| C | -5.98803 | 9.53688  | -1.31675 |
| H | -6.50185 | 8.80311  | -1.95249 |
| H | -4.99160 | 9.66264  | -1.75592 |
| C | -5.12505 | 9.90471  | 1.09044  |
| H | -4.96077 | 9.36166  | 2.03257  |
| H | -5.82667 | 10.71722 | 1.32912  |
| C | -7.70168 | 6.13362  | 1.73008  |
| H | -7.14626 | 6.43506  | 2.62189  |
| H | -7.58818 | 5.05223  | 1.59555  |
| H | -8.76358 | 6.34078  | 1.91032  |
| C | -8.12663 | 6.49528  | -0.70670 |
| H | -7.88403 | 7.06251  | -1.60943 |
| H | -9.17768 | 6.68711  | -0.45921 |
| H | -8.02369 | 5.42736  | -0.92656 |
| C | -5.23970 | 5.27696  | 0.08545  |
| C | -4.73279 | 4.67403  | 1.25851  |
| C | -5.23564 | 4.60559  | -1.15678 |
| C | -4.32111 | 3.33504  | 1.18471  |
| C | -4.81496 | 3.26631  | -1.17763 |
| C | -4.38565 | 2.62625  | -0.01543 |
| H | -3.92839 | 2.84665  | 2.07276  |
| H | -4.80352 | 2.72541  | -2.12045 |
| H | -4.07028 | 1.58542  | -0.05113 |
| C | -4.48974 | 5.47666  | 2.53423  |
| H | -5.09225 | 6.38628  | 2.48399  |
| C | -3.01156 | 5.93466  | 2.57219  |
| C | -4.88285 | 4.72654  | 3.82146  |
| H | -5.92394 | 4.38461  | 3.78421  |
| H | -4.24697 | 3.84993  | 3.99371  |
| H | -4.76955 | 5.38660  | 4.69043  |
| H | -2.33668 | 5.06992  | 2.60507  |
| H | -2.82394 | 6.55067  | 3.46136  |
| H | -2.77617 | 6.52674  | 1.68095  |
| C | -5.52076 | 5.32965  | -2.46972 |
| H | -6.03126 | 6.26534  | -2.23831 |
| C | -6.42088 | 4.53167  | -3.43294 |
| C | -4.17969 | 5.71819  | -3.13794 |

|   |          |          |          |
|---|----------|----------|----------|
| H | -3.58842 | 6.34478  | -2.46138 |
| H | -3.59418 | 4.82455  | -3.38878 |
| H | -4.36235 | 6.27960  | -4.06354 |
| H | -5.93037 | 3.61708  | -3.78726 |
| H | -6.65739 | 5.13831  | -4.31593 |
| H | -7.36438 | 4.24268  | -2.95475 |
| C | -3.78811 | 10.48744 | 0.60898  |
| H | -3.10278 | 9.68420  | 0.31989  |
| H | -3.91820 | 11.14832 | -0.25634 |
| H | -3.31821 | 11.07812 | 1.40532  |
| C | -6.75155 | 10.87013 | -1.36696 |
| H | -7.75766 | 10.78295 | -0.93806 |
| H | -6.22575 | 11.66055 | -0.81945 |
| H | -6.86419 | 11.20609 | -2.40513 |

**Meg**

|   |          |          |          |
|---|----------|----------|----------|
| C | 0.18816  | 10.12280 | 0.59045  |
| C | 0.20224  | 10.69823 | 1.87940  |
| C | 1.31740  | 9.50021  | 0.05620  |
| C | 2.46034  | 9.47827  | 0.86030  |
| C | 2.47721  | 10.05226 | 2.14493  |
| C | 1.34476  | 10.67377 | 2.68119  |
| H | -0.72328 | 10.16575 | 0.00088  |
| H | -0.69858 | 11.17351 | 2.25723  |
| H | 1.30180  | 9.05671  | -0.93442 |
| H | 1.34217  | 11.12105 | 3.67019  |
| N | 3.73181  | 8.93065  | 0.64710  |
| N | 3.76518  | 9.82924  | 2.65450  |
| C | 4.51913  | 9.15993  | 1.73497  |
| C | 5.97159  | 8.77102  | 2.00050  |
| N | 6.14954  | 7.32517  | 2.05881  |
| C | 7.05378  | 9.32465  | 0.98628  |
| H | 6.18209  | 9.22978  | 2.97452  |
| C | 7.50410  | 8.04438  | 0.23056  |
| C | 7.22653  | 6.80948  | 1.13277  |
| H | 8.56440  | 8.10162  | -0.03514 |
| H | 6.95851  | 7.95173  | -0.71490 |
| C | 6.72985  | 5.60818  | 0.30251  |
| H | 5.81601  | 5.83252  | -0.25420 |
| H | 6.53075  | 4.74884  | 0.94998  |
| H | 7.50007  | 5.30973  | -0.41749 |
| C | 8.50320  | 6.33661  | 1.86347  |
| H | 9.18941  | 5.88606  | 1.13791  |
| H | 8.25735  | 5.57242  | 2.60675  |
| H | 9.03613  | 7.14788  | 2.36099  |
| C | 6.54220  | 10.42512 | 0.03561  |
| H | 5.76758  | 10.07812 | -0.65138 |
| H | 7.37321  | 10.79278 | -0.57644 |
| H | 6.14685  | 11.28285 | 0.59465  |
| C | 8.22360  | 9.93746  | 1.79413  |
| H | 8.66582  | 9.22849  | 2.49627  |
| H | 7.88963  | 10.81401 | 2.36267  |

|                         |          |          |          |   |          |          |          |
|-------------------------|----------|----------|----------|---|----------|----------|----------|
| H                       | 9.01420  | 10.26330 | 1.10920  | C | 3.77546  | 9.47806  | 0.78769  |
| C                       | 4.04946  | 8.19167  | -0.57752 | C | 6.70250  | 8.72276  | 2.68814  |
| H                       | 5.03012  | 7.73983  | -0.48957 | N | 6.64078  | 7.43531  | 2.57964  |
| H                       | 4.02636  | 8.86972  | -1.43611 | C | 7.54145  | 9.40096  | 1.64969  |
| H                       | 3.30176  | 7.40561  | -0.71514 | H | 6.26079  | 9.21063  | 3.55447  |
| C                       | 4.17978  | 10.19510 | 4.01965  | C | 7.64624  | 8.27625  | 0.57609  |
| H                       | 4.53570  | 9.30848  | 4.54819  | C | 7.33613  | 6.92696  | 1.28396  |
| H                       | 3.30808  | 10.59089 | 4.54088  | H | 8.63072  | 8.25636  | 0.10135  |
| H                       | 4.95758  | 10.96256 | 3.99756  | H | 6.89531  | 8.46337  | -0.19663 |
| C                       | 5.68375  | 6.64206  | 3.25266  | C | 6.36656  | 6.05035  | 0.48942  |
| C                       | 6.32566  | 6.82372  | 4.51650  | H | 5.44719  | 6.58651  | 0.25151  |
| C                       | 4.51612  | 5.83095  | 3.17720  | H | 6.11967  | 5.13380  | 1.03339  |
| C                       | 5.78854  | 6.19114  | 5.64815  | H | 6.85304  | 5.76512  | -0.44979 |
| C                       | 4.03834  | 5.20049  | 4.33670  | C | 8.58776  | 6.11388  | 1.64696  |
| C                       | 4.66195  | 5.37695  | 5.56747  | H | 9.01993  | 5.72404  | 0.71948  |
| H                       | 6.27581  | 6.32692  | 6.61046  | H | 8.33407  | 5.26120  | 2.28374  |
| H                       | 3.15349  | 4.57201  | 4.27357  | H | 9.35145  | 6.71365  | 2.14585  |
| H                       | 4.27438  | 4.88563  | 6.45692  | C | 6.94357  | 10.71135 | 1.10239  |
| C                       | 7.59016  | 7.65570  | 4.72936  | H | 5.95250  | 10.52609 | 0.67800  |
| H                       | 7.90926  | 8.03026  | 3.75911  | H | 7.61299  | 11.11357 | 0.33351  |
| C                       | 8.74705  | 6.80156  | 5.30080  | H | 6.85956  | 11.46533 | 1.89497  |
| C                       | 7.35748  | 8.88052  | 5.64374  | C | 8.91750  | 9.72362  | 2.31957  |
| H                       | 6.61842  | 9.57238  | 5.22752  | H | 9.43198  | 8.82771  | 2.67624  |
| H                       | 7.00761  | 8.57641  | 6.63682  | H | 8.79449  | 10.41176 | 3.16319  |
| H                       | 8.29320  | 9.43679  | 5.77515  | H | 9.55260  | 10.21222 | 1.57305  |
| H                       | 8.53976  | 6.49650  | 6.33260  | C | 3.44618  | 8.07552  | -1.26134 |
| H                       | 9.67804  | 7.38122  | 5.30739  | H | 4.53661  | 8.08068  | -1.23758 |
| H                       | 8.91171  | 5.89458  | 4.71240  | H | 3.10792  | 8.48389  | -2.22045 |
| C                       | 3.70992  | 5.64511  | 1.89666  | H | 3.08059  | 7.04568  | -1.16721 |
| H                       | 4.22163  | 6.20816  | 1.11626  | C | 3.31222  | 11.00803 | 2.71560  |
| C                       | 2.28221  | 6.21911  | 2.05381  | H | 4.39757  | 10.95069 | 2.80658  |
| C                       | 3.63991  | 4.16823  | 1.44991  | H | 2.84525  | 10.63396 | 3.63471  |
| H                       | 4.63693  | 3.73074  | 1.34221  | H | 3.02024  | 12.05490 | 2.57207  |
| H                       | 3.08680  | 3.56134  | 2.17595  | C | 6.13272  | 6.52478  | 3.60891  |
| H                       | 3.12340  | 4.08304  | 0.48558  | C | 7.01001  | 6.16875  | 4.66346  |
| H                       | 1.68913  | 5.61526  | 2.74982  | C | 4.82125  | 6.01170  | 3.50175  |
| H                       | 1.75389  | 6.22163  | 1.09178  | C | 6.56465  | 5.18988  | 5.56342  |
| H                       | 2.29537  | 7.24242  | 2.44258  | C | 4.44101  | 5.02858  | 4.42854  |
|                         |          |          |          | C | 5.30739  | 4.60179  | 5.43235  |
| <b>TS<sup>Meg</sup></b> |          |          |          | H | 7.21130  | 4.89101  | 6.38312  |
| C                       | -0.75890 | 9.41103  | -0.18750 | H | 3.43979  | 4.61066  | 4.37302  |
| C                       | -0.79462 | 10.25660 | 0.93882  | H | 4.99134  | 3.83375  | 6.13403  |
| C                       | 0.44630  | 8.88608  | -0.66896 | C | 8.34430  | 6.86490  | 4.92222  |
| C                       | 1.61134  | 9.23611  | 0.01852  | H | 8.63070  | 7.41499  | 4.02434  |
| C                       | 1.57583  | 10.08367 | 1.14405  | C | 9.49525  | 5.88702  | 5.23622  |
| C                       | 0.37371  | 10.60917 | 1.62477  | C | 8.17973  | 7.90752  | 6.05513  |
| H                       | -1.68743 | 9.16154  | -0.69405 | H | 7.39397  | 8.63654  | 5.82121  |
| H                       | -1.75009 | 10.64448 | 1.28175  | H | 7.90576  | 7.41969  | 6.99756  |
| H                       | 0.46776  | 8.23542  | -1.53880 | H | 9.11811  | 8.45198  | 6.21323  |
| H                       | 0.34022  | 11.26294 | 2.49185  | H | 9.34115  | 5.37189  | 6.19044  |
| N                       | 2.96297  | 8.90359  | -0.16137 | H | 10.44128 | 6.43542  | 5.31139  |
| N                       | 2.90793  | 10.20336 | 1.56870  | H | 9.60164  | 5.12558  | 4.45602  |

|            |          |          |          |               |          |          |          |
|------------|----------|----------|----------|---------------|----------|----------|----------|
| C          | 3.77195  | 6.57874  | 2.55088  | H             | -2.69413 | 6.50712  | 1.79629  |
| H          | 4.25229  | 7.29380  | 1.87571  | C             | -5.52778 | 5.31173  | -2.49568 |
| C          | 2.73117  | 7.37876  | 3.37306  | H             | -6.02365 | 6.25972  | -2.27141 |
| C          | 3.06290  | 5.50547  | 1.70005  | C             | -6.48432 | 4.49399  | -3.38787 |
| H          | 3.76991  | 4.91292  | 1.11089  | C             | -4.22183 | 5.65791  | -3.25303 |
| H          | 2.48613  | 4.81358  | 2.32409  | H             | -3.55294 | 6.27507  | -2.64022 |
| H          | 2.35815  | 5.98661  | 1.01210  | H             | -3.67401 | 4.74891  | -3.52592 |
| H          | 2.20781  | 6.72788  | 4.08252  | H             | -4.44947 | 6.20751  | -4.17378 |
| H          | 1.98501  | 7.82702  | 2.70970  | H             | -6.01524 | 3.56817  | -3.73814 |
| H          | 3.21100  | 8.17988  | 3.94658  | H             | -6.76139 | 5.07633  | -4.27390 |
| <b>Etg</b> |          |          |          | H             | -7.40250 | 4.22315  | -2.85515 |
| C          | -7.21227 | 8.44782  | 0.67900  | C             | -3.75923 | 10.44869 | 0.64302  |
| C          | -7.26284 | 6.90559  | 0.48630  | H             | -3.03758 | 9.64508  | 0.45028  |
| C          | -5.85319 | 8.95754  | 0.09598  | H             | -3.83535 | 11.05677 | -0.26426 |
| H          | -7.26556 | 8.68734  | 1.74555  | H             | -3.33147 | 11.08244 | 1.42703  |
| H          | -8.06505 | 8.92622  | 0.19278  | C             | -6.72837 | 10.94022 | -1.34744 |
| N          | -5.77078 | 6.60924  | 0.16054  | H             | -7.72568 | 10.87174 | -0.89819 |
| C          | -5.09242 | 7.68565  | -0.04586 | H             | -6.16881 | 11.71395 | -0.81245 |
| C          | -5.99845 | 9.58881  | -1.33402 | H             | -6.85430 | 11.27852 | -2.38150 |
| H          | -6.53600 | 8.87471  | -1.97065 | <b>TS Etg</b> |          |          |          |
| H          | -5.00163 | 9.70439  | -1.77703 | C             | 13.45992 | 5.60759  | 2.13355  |
| C          | -5.12420 | 9.91125  | 1.09579  | C             | 14.14220 | 5.64310  | 0.90144  |
| H          | -5.01513 | 9.37827  | 2.05015  | C             | 12.29528 | 4.85026  | 2.29954  |
| H          | -5.80807 | 10.74553 | 1.29381  | C             | 11.83867 | 4.12858  | 1.19247  |
| C          | -7.70120 | 6.14949  | 1.74379  | C             | 12.52674 | 4.15524  | -0.03766 |
| H          | -7.14628 | 6.46538  | 2.62962  | C             | 13.68890 | 4.91524  | -0.20416 |
| H          | -7.59226 | 5.06764  | 1.61915  | H             | 13.84512 | 6.18224  | 2.97170  |
| H          | -8.76116 | 6.36359  | 1.91687  | H             | 15.04134 | 6.24647  | 0.80864  |
| C          | -8.12922 | 6.47318  | -0.70648 | H             | 11.77253 | 4.83090  | 3.25165  |
| H          | -7.88401 | 7.02319  | -1.61849 | H             | 14.22380 | 4.94516  | -1.14893 |
| H          | -9.17555 | 6.67902  | -0.45811 | N             | 10.73287 | 3.28632  | 0.98912  |
| H          | -8.03416 | 5.40101  | -0.90018 | N             | 11.79101 | 3.32565  | -0.90074 |
| H          | -4.04126 | 7.61124  | -0.31594 | C             | 10.67847 | 2.79139  | -0.29209 |
| C          | -5.20808 | 5.26238  | 0.07267  | C             | 8.04412  | 2.20790  | -2.91075 |
| C          | -4.68726 | 4.68864  | 1.25422  | N             | 7.43995  | 1.24242  | -2.29834 |
| C          | -5.18846 | 4.61285  | -1.18104 | C             | 7.50260  | 3.57292  | -2.62762 |
| C          | -4.22379 | 3.36812  | 1.16651  | H             | 8.81313  | 1.97583  | -3.64335 |
| C          | -4.71292 | 3.29249  | -1.20080 | C             | 6.64026  | 3.29297  | -1.35995 |
| C          | -4.25934 | 2.66821  | -0.03970 | C             | 6.37000  | 1.76459  | -1.30036 |
| H          | -3.81528 | 2.88844  | 2.05113  | H             | 5.70397  | 3.85535  | -1.36867 |
| H          | -4.68232 | 2.75447  | -2.14385 | H             | 7.20798  | 3.60142  | -0.47809 |
| H          | -3.90296 | 1.64192  | -0.08069 | C             | 6.62277  | 1.17802  | 0.08939  |
| C          | -4.49172 | 5.47952  | 2.54645  | H             | 7.62585  | 1.41844  | 0.44455  |
| H          | -5.08765 | 6.39558  | 2.49069  | H             | 6.48679  | 0.09277  | 0.09669  |
| C          | -3.01102 | 5.91778  | 2.66608  | H             | 5.89590  | 1.61567  | 0.78231  |
| C          | -4.94766 | 4.71289  | 3.80444  | C             | 4.96858  | 1.36495  | -1.78588 |
| H          | -5.98612 | 4.37538  | 3.71663  | H             | 4.87808  | 0.27881  | -1.88101 |
| H          | -4.32269 | 3.83248  | 3.98884  | H             | 4.70681  | 1.82723  | -2.73998 |
| H          | -4.86934 | 5.35888  | 4.68623  | H             | 4.24126  | 1.69960  | -1.03893 |
| H          | -2.34983 | 5.04630  | 2.73201  | C             | 8.60575  | 4.63108  | -2.35433 |
| H          | -2.86415 | 6.52658  | 3.56579  | H             | 8.10209  | 5.53108  | -1.98057 |



|   |          |          |          |                        |          |          |          |
|---|----------|----------|----------|------------------------|----------|----------|----------|
| H | 9.22820  | 4.25314  | -1.53647 | H                      | 8.04036  | 3.83458  | 3.06107  |
| C | 6.62412  | 3.96731  | -3.87626 | H                      | 9.23775  | 5.03702  | 2.54237  |
| H | 5.83718  | 3.21566  | -4.00165 | H                      | 8.15634  | 4.29778  | 1.34947  |
| H | 7.24326  | 3.91506  | -4.77996 |                        |          |          |          |
| C | 9.74648  | 2.97505  | 2.02968  |                        |          |          |          |
| H | 10.29046 | 2.75189  | 2.95597  | <b>Me<sub>10</sub></b> |          |          |          |
| H | 9.24412  | 2.05622  | 1.71692  | C                      | -7.82567 | 1.77512  | 1.57759  |
| C | 12.20990 | 2.99728  | -2.26790 | C                      | -6.59324 | 1.24080  | 1.97163  |
| H | 12.39136 | 3.93372  | -2.81095 | C                      | -7.89060 | 2.81872  | 0.63392  |
| H | 11.35462 | 2.49910  | -2.73295 | C                      | -5.45583 | 2.79370  | 0.53439  |
| C | 7.60168  | -0.18010 | -2.61084 | C                      | -5.38711 | 1.73954  | 1.44600  |
| C | 6.87933  | -0.69900 | -3.71385 | H                      | -4.43066 | 1.31664  | 1.74430  |
| C | 8.43629  | -0.97886 | -1.79916 | H                      | -8.74627 | 1.37939  | 1.99991  |
| C | 6.94139  | -2.08439 | -3.92300 | H                      | -6.56388 | 0.43069  | 2.69680  |
| C | 8.44617  | -2.35880 | -2.05576 | C                      | -6.69859 | 3.32675  | 0.12721  |
| C | 7.69146  | -2.91163 | -3.08805 | H                      | -8.85088 | 3.20856  | 0.30543  |
| H | 6.39940  | -2.51877 | -4.75792 | N                      | -6.49651 | 4.31353  | -0.89513 |
| H | 9.07611  | -3.00239 | -1.44812 | C                      | -5.05130 | 4.57711  | -0.83258 |
| H | 7.71163  | -3.98448 | -3.26363 | N                      | -4.42861 | 3.45158  | -0.16333 |
| C | 6.13705  | 0.17288  | -4.72410 | C                      | -7.11802 | 3.88884  | -2.17858 |
| H | 6.00367  | 1.16792  | -4.29589 | H                      | -8.18799 | 3.74006  | -2.00758 |
| C | 4.73075  | -0.35737 | -5.07225 | H                      | -6.69006 | 2.94163  | -2.54637 |
| C | 6.99533  | 0.34562  | -6.00104 | H                      | -6.99725 | 4.65958  | -2.93415 |
| H | 7.98228  | 0.76488  | -5.76934 | C                      | -3.34358 | 2.65860  | -0.75453 |
| H | 7.15571  | -0.61839 | -6.49717 | H                      | -3.64549 | 1.60427  | -0.83230 |
| H | 6.49516  | 1.01523  | -6.71069 | H                      | -2.42183 | 2.70763  | -0.15685 |
| H | 4.77837  | -1.30937 | -5.61177 | H                      | -3.12496 | 3.03539  | -1.75760 |
| H | 4.21078  | 0.35849  | -5.71932 | C                      | -4.44479 | 5.79521  | -0.91881 |
| H | 4.12410  | -0.51040 | -4.17312 | N                      | -4.99433 | 6.94877  | -1.51883 |
| C | 9.41817  | -0.40156 | -0.78721 | C                      | -4.16229 | 8.18602  | -1.29090 |
| H | 9.24815  | 0.67385  | -0.68006 | C                      | -3.20835 | 7.70493  | -0.18199 |
| C | 10.85546 | -0.53681 | -1.34298 | C                      | -3.08043 | 6.15901  | -0.29208 |
| C | 9.32133  | -1.05515 | 0.60635  | H                      | -3.64602 | 7.95230  | 0.79241  |
| H | 8.30506  | -1.01396 | 1.01177  | H                      | -2.23242 | 8.19856  | -0.24133 |
| H | 9.62735  | -2.10734 | 0.58205  | C                      | -5.00278 | 9.37751  | -0.79946 |
| H | 9.98919  | -0.53627 | 1.30411  | H                      | -5.55983 | 9.12991  | 0.10746  |
| H | 11.14237 | -1.58873 | -1.45738 | H                      | -5.70626 | 9.70877  | -1.56906 |
| H | 11.55920 | -0.05457 | -0.65702 | H                      | -4.33612 | 10.21848 | -0.57250 |
| H | 10.94897 | -0.05283 | -2.32200 | C                      | -3.41465 | 8.65415  | -2.56108 |
| C | 5.97984  | 5.35776  | -3.77095 | H                      | -2.86715 | 9.57774  | -2.33959 |
| H | 5.35907  | 5.45371  | -2.87295 | H                      | -4.12452 | 8.87078  | -3.36603 |
| H | 6.72534  | 6.15828  | -3.75325 | H                      | -2.69574 | 7.91835  | -2.92347 |
| H | 5.33254  | 5.52615  | -4.63867 | C                      | -1.86053 | 5.77821  | -1.17010 |
| C | 9.49303  | 4.99704  | -3.55276 | H                      | -1.94381 | 6.16707  | -2.18812 |
| H | 10.28275 | 5.68487  | -3.23183 | H                      | -1.73900 | 4.69494  | -1.23540 |
| H | 9.98778  | 4.11891  | -3.98456 | H                      | -0.94459 | 6.19292  | -0.72801 |
| H | 8.93337  | 5.49176  | -4.35344 | C                      | -2.87136 | 5.59020  | 1.13021  |
| C | 13.45102 | 2.09721  | -2.31694 | H                      | -2.04236 | 6.12707  | 1.61048  |
| H | 13.26867 | 1.15805  | -1.78597 | H                      | -3.77143 | 5.72969  | 1.73891  |
| H | 13.70202 | 1.86466  | -3.35841 | H                      | -2.62915 | 4.52643  | 1.12820  |
| H | 14.31856 | 2.58413  | -1.86076 | C                      | -5.99176 | 6.92248  | -2.55574 |
| C | 8.73646  | 4.10570  | 2.25881  | C                      | -7.32375 | 7.33056  | -2.27342 |
|   |          |          |          | C                      | -8.25873 | 7.34851  | -3.32031 |

|                |          |          |          |             |          |          |          |
|----------------|----------|----------|----------|-------------|----------|----------|----------|
| C              | -7.91554 | 6.95453  | -4.61153 | C           | -3.62217 | 7.97684  | -0.04245 |
| C              | -6.61897 | 6.51354  | -4.87146 | C           | -4.14894 | 6.59954  | 0.49336  |
| C              | -5.64240 | 6.48388  | -3.86555 | H           | -4.19550 | 8.79535  | 0.41033  |
| H              | -9.28049 | 7.65768  | -3.11266 | H           | -2.56644 | 8.14348  | 0.19903  |
| H              | -8.65771 | 6.97444  | -5.40704 | C           | -4.22664 | 9.33649  | -2.14120 |
| H              | -6.36090 | 6.17704  | -5.87298 | H           | -5.04396 | 9.80572  | -1.58718 |
| C              | -7.81644 | 7.67478  | -0.86803 | H           | -4.52318 | 9.25907  | -3.19359 |
| C              | -8.44253 | 9.08593  | -0.78949 | H           | -3.35436 | 9.99869  | -2.08409 |
| H              | -7.77884 | 9.85878  | -1.18836 | C           | -2.64928 | 7.38441  | -2.30986 |
| H              | -8.67411 | 9.33855  | 0.25296  | H           | -1.75292 | 7.96140  | -2.05150 |
| H              | -9.38193 | 9.13064  | -1.35449 | H           | -2.77546 | 7.42966  | -3.39321 |
| C              | -8.83512 | 6.62873  | -0.35816 | H           | -2.47703 | 6.34150  | -2.02535 |
| H              | -6.95297 | 7.62969  | -0.20018 | C           | -2.98611 | 5.67470  | 0.89318  |
| H              | -9.72084 | 6.58844  | -1.00470 | H           | -2.27260 | 5.54027  | 0.07712  |
| H              | -9.16909 | 6.89300  | 0.65347  | H           | -3.35345 | 4.69243  | 1.20392  |
| H              | -8.37344 | 5.64054  | -0.32346 | H           | -2.44346 | 6.11675  | 1.73938  |
| C              | -4.26809 | 5.91540  | -4.21615 | C           | -5.02476 | 6.81733  | 1.75600  |
| C              | -4.32941 | 4.38913  | -4.45678 | H           | -4.43581 | 7.30505  | 2.54620  |
| H              | -4.69268 | 3.86566  | -3.56891 | H           | -5.89112 | 7.44848  | 1.53408  |
| H              | -3.32940 | 4.00461  | -4.69556 | H           | -5.39610 | 5.85880  | 2.13573  |
| H              | -4.99417 | 4.14559  | -5.29504 | C           | -6.12703 | 7.07375  | -2.58049 |
| C              | -3.62785 | 6.61735  | -5.43406 | C           | -7.30983 | 7.77472  | -2.22518 |
| H              | -3.61742 | 6.07075  | -3.35683 | C           | -8.38026 | 7.79133  | -3.12958 |
| H              | -4.17826 | 6.39857  | -6.35694 | C           | -8.29473 | 7.14742  | -4.36426 |
| H              | -2.59809 | 6.26463  | -5.57435 | C           | -7.12628 | 6.47130  | -4.70512 |
| H              | -3.60336 | 7.70447  | -5.30917 | C           | -6.03065 | 6.41092  | -3.82719 |
| <b>TS Me10</b> |          |          |          | H           | -9.29380 | 8.31924  | -2.86537 |
| C              | -6.54585 | 0.13604  | 0.48395  | H           | -9.13510 | 7.17333  | -5.05518 |
| C              | -5.17444 | -0.09149 | 0.69120  | H           | -7.06290 | 5.96729  | -5.66672 |
| C              | -7.01113 | 1.32078  | -0.10638 | C           | -7.46763 | 8.50214  | -0.89099 |
| C              | -4.68109 | 2.04994  | -0.25718 | C           | -7.88111 | 9.97880  | -1.08148 |
| C              | -4.21736 | 0.86747  | 0.32078  | H           | -7.20115 | 10.50114 | -1.76412 |
| H              | -3.15657 | 0.69161  | 0.47961  | H           | -7.86991 | 10.50204 | -0.11692 |
| H              | -7.26345 | -0.62514 | 0.78123  | H           | -8.89446 | 10.06438 | -1.49210 |
| H              | -4.84815 | -1.02611 | 1.14092  | C           | -8.46493 | 7.77656  | 0.03977  |
| C              | -6.05955 | 2.27749  | -0.47450 | H           | -6.49638 | 8.49220  | -0.39205 |
| H              | -8.07235 | 1.47970  | -0.27696 | H           | -9.46030 | 7.71782  | -0.41845 |
| N              | -6.15523 | 3.51760  | -1.10194 | H           | -8.56179 | 8.31578  | 0.99099  |
| C              | -4.91129 | 4.12305  | -1.27198 | H           | -8.12506 | 6.75985  | 0.25889  |
| N              | -4.02196 | 3.17345  | -0.76843 | C           | -4.79082 | 5.63771  | -4.26464 |
| C              | -7.39990 | 4.21666  | -1.36601 | C           | -5.11294 | 4.17999  | -4.66002 |
| H              | -7.30438 | 5.20685  | -0.90065 | H           | -5.59310 | 3.64994  | -3.83295 |
| H              | -8.23517 | 3.66189  | -0.93243 | H           | -4.18595 | 3.64696  | -4.90820 |
| H              | -7.56469 | 4.34965  | -2.43978 | H           | -5.76887 | 4.13066  | -5.53812 |
| C              | -2.59882 | 3.15479  | -1.08147 | C           | -4.07915 | 6.35811  | -5.43378 |
| H              | -2.36279 | 2.26883  | -1.68640 | H           | -4.12193 | 5.58456  | -3.40412 |
| H              | -1.98589 | 3.13494  | -0.17280 | H           | -4.69794 | 6.33633  | -6.33990 |
| H              | -2.36425 | 4.05156  | -1.65653 | H           | -3.12470 | 5.86871  | -5.66709 |
| C              | -5.11657 | 6.09117  | -0.60778 | H           | -3.87821 | 7.41000  | -5.20125 |
| N              | -5.06359 | 6.99980  | -1.60240 | <b>Et10</b> |          |          |          |
| C              | -3.86981 | 7.96359  | -1.56416 | C           | -0.73223 | 4.20081  | 1.52914  |

|   |          |          |          |                          |          |          |          |
|---|----------|----------|----------|--------------------------|----------|----------|----------|
| C | -1.55604 | 3.18459  | 1.02949  | H                        | 4.22711  | 1.30880  | -6.97636 |
| C | -1.20397 | 2.46918  | -0.12947 | H                        | 2.85348  | 2.09529  | -7.76931 |
| C | 0.00314  | 2.78002  | -0.75947 | H                        | 4.18055  | 3.07656  | -7.13398 |
| C | 0.83114  | 3.80788  | -0.25430 | H                        | 1.07896  | 3.38831  | -6.30928 |
| C | 0.47289  | 4.53041  | 0.88053  | H                        | 2.44520  | 4.43765  | -5.87558 |
| N | 1.94882  | 3.96818  | -1.11445 | H                        | 1.47027  | 3.68605  | -4.60178 |
| N | 0.56474  | 2.24614  | -1.94208 | C                        | 1.49585  | -1.32128 | -2.15058 |
| C | 1.93351  | 2.80048  | -1.98316 | H                        | 2.31099  | -0.84747 | -1.59847 |
| C | 3.09488  | 2.10530  | -2.20385 | C                        | 1.75387  | -2.84418 | -2.21366 |
| C | 4.48771  | 2.46128  | -1.60125 | C                        | 0.20114  | -1.04459 | -1.35277 |
| N | 3.23613  | 0.93332  | -2.97704 | H                        | 0.08222  | 0.02601  | -1.17680 |
| C | 4.64118  | 0.38940  | -2.99055 | H                        | -0.68253 | -1.41970 | -1.88454 |
| C | 5.20845  | 1.08957  | -1.75533 | H                        | 0.24677  | -1.55028 | -0.37987 |
| H | 6.29638  | 1.18597  | -1.78724 | H                        | 0.89592  | -3.37172 | -2.64847 |
| H | 4.96095  | 0.47964  | -0.87849 | H                        | 1.90576  | -3.24288 | -1.20274 |
| H | -1.02470 | 4.74341  | 2.42499  | H                        | 2.63467  | -3.08963 | -2.81479 |
| H | -2.48510 | 2.94339  | 1.54114  | C                        | 4.67506  | 4.19636  | 0.46622  |
| H | 1.10298  | 5.33505  | 1.25257  | H                        | 5.65493  | 4.59850  | 0.18408  |
| H | -1.86365 | 1.70190  | -0.52656 | H                        | 3.90795  | 4.88669  | 0.11847  |
| C | 4.69126  | -1.14002 | -2.82857 | H                        | 4.63533  | 4.18682  | 1.56310  |
| H | 4.23974  | -1.46332 | -1.88876 | C                        | 6.72991  | 3.65831  | -2.29408 |
| H | 5.73861  | -1.46424 | -2.82983 | H                        | 7.21854  | 2.83885  | -2.83275 |
| H | 4.18485  | -1.64486 | -3.65772 | H                        | 7.10240  | 4.59749  | -2.72174 |
| C | 5.41748  | 0.72537  | -4.28669 | H                        | 7.06398  | 3.61445  | -1.25095 |
| H | 6.43030  | 0.31127  | -4.21739 | C                        | -1.26754 | 3.22018  | -3.45596 |
| H | 5.50480  | 1.79781  | -4.46378 | H                        | -1.99886 | 2.89295  | -4.20659 |
| H | 4.93101  | 0.26867  | -5.15406 | H                        | -1.81815 | 3.60895  | -2.59299 |
| C | 5.19616  | 3.59445  | -2.41031 | H                        | -0.68824 | 4.03921  | -3.88939 |
| H | 4.92193  | 3.51134  | -3.46784 | C                        | 0.95864  | 5.93227  | -2.43427 |
| H | 4.78459  | 4.54958  | -2.07653 | H                        | 1.17152  | 6.97774  | -2.69281 |
| C | 4.45982  | 2.76546  | -0.05101 | H                        | 0.77046  | 5.38876  | -3.36337 |
| H | 5.24751  | 2.14869  | 0.40304  | H                        | 0.04722  | 5.90943  | -1.82728 |
| H | 3.51277  | 2.37954  | 0.34178  |                          |          |          |          |
| C | 2.14981  | 5.33200  | -1.67376 |                          |          |          |          |
| H | 3.02292  | 5.28887  | -2.32752 | <b>TS<sup>Et</sup>10</b> |          |          |          |
| H | 2.41146  | 5.98890  | -0.83424 | C                        | -2.41298 | 3.51589  | 0.71051  |
| C | -0.37215 | 2.03056  | -3.07475 | C                        | -2.19594 | 2.32783  | 1.43360  |
| H | -1.00491 | 1.17559  | -2.80617 | C                        | -0.99647 | 1.61266  | 1.31500  |
| H | 0.20823  | 1.71801  | -3.93560 | C                        | -0.02464 | 2.12750  | 0.45399  |
| C | 2.26331  | 0.42811  | -3.90423 | C                        | -0.24074 | 3.32077  | -0.26858 |
| C | 2.11431  | 1.03676  | -5.18175 | C                        | -1.43753 | 4.03310  | -0.15209 |
| C | 1.45785  | -0.68454 | -3.54036 | N                        | 0.91906  | 3.53557  | -1.01979 |
| C | 1.18719  | 0.49177  | -6.08254 | N                        | 1.25668  | 1.69237  | 0.09109  |
| C | 0.54619  | -1.18919 | -4.47985 | C                        | 1.86100  | 2.55862  | -0.80097 |
| C | 0.41287  | -0.61694 | -5.74347 | C                        | 3.19266  | 2.47070  | -2.43286 |
| H | 1.05972  | 0.95258  | -7.05934 | C                        | 4.61491  | 2.60662  | -1.80777 |
| H | -0.08078 | -2.03594 | -4.21023 | N                        | 3.15824  | 1.23825  | -3.02468 |
| H | -0.30128 | -1.02406 | -6.45643 | C                        | 4.36111  | 0.31625  | -2.76427 |
| C | 2.85240  | 2.31249  | -5.58379 | C                        | 5.09502  | 1.12891  | -1.67371 |
| H | 3.60409  | 2.51430  | -4.82100 | H                        | 6.18092  | 1.00782  | -1.75751 |
| C | 1.89875  | 3.52847  | -5.59387 | H                        | 4.80917  | 0.74397  | -0.68844 |
| C | 3.57052  | 2.18441  | -6.94433 | H                        | -3.35474 | 4.04644  | 0.82789  |
|   |          |          |          | H                        | -2.97242 | 1.95900  | 2.09942  |

|   |          |          |          |                        |          |          |          |
|---|----------|----------|----------|------------------------|----------|----------|----------|
| H | -1.60666 | 4.95271  | -0.70511 | H                      | 5.74410  | 3.71027  | 1.39482  |
| H | -0.83618 | 0.69280  | 1.87077  | H                      | 5.51678  | 2.01216  | 0.97715  |
| C | 3.97550  | -1.08576 | -2.26566 | H                      | 6.75354  | 2.96531  | 0.14668  |
| H | 3.35178  | -1.04893 | -1.36939 | C                      | 6.95215  | 3.65003  | -2.49716 |
| H | 4.88502  | -1.64864 | -2.01898 | H                      | 7.49268  | 2.72190  | -2.27225 |
| H | 3.43968  | -1.64414 | -3.03945 | H                      | 7.46366  | 4.12706  | -3.34299 |
| C | 5.19128  | 0.12515  | -4.05262 | H                      | 7.05576  | 4.31676  | -1.63456 |
| H | 6.04682  | -0.52982 | -3.84788 | C                      | 2.47161  | 0.98360  | 2.15305  |
| H | 5.57505  | 1.06755  | -4.44540 | H                      | 1.65128  | 1.30514  | 2.80404  |
| H | 4.58405  | -0.34708 | -4.83281 | H                      | 2.96773  | 0.12597  | 2.62325  |
| C | 5.48029  | 3.38774  | -2.85999 | H                      | 3.19472  | 1.80231  | 2.07923  |
| H | 5.46676  | 2.85694  | -3.81357 | C                      | 1.64756  | 5.91543  | -1.16907 |
| H | 4.97384  | 4.34499  | -3.04108 | H                      | 2.62174  | 5.70509  | -0.71460 |
| C | 4.67584  | 3.41791  | -0.47631 | H                      | 1.76981  | 6.74991  | -1.87069 |
| H | 4.81536  | 4.47833  | -0.72697 | H                      | 0.95864  | 6.23344  | -0.37637 |
| H | 3.69266  | 3.34742  | -0.00054 | <b>Me<sup>11</sup></b> |          |          |          |
| C | 1.13037  | 4.68034  | -1.91355 | C                      | -3.15894 | 0.18580  | 1.09457  |
| H | 1.86684  | 4.31430  | -2.64378 | C                      | -3.08012 | 1.67166  | 0.63595  |
| H | 0.17834  | 4.89179  | -2.41647 | N                      | -4.61901 | -0.01524 | 1.32197  |
| C | 1.95782  | 0.59480  | 0.76020  | H                      | -2.61330 | -0.00345 | 2.02470  |
| H | 1.27677  | -0.26327 | 0.82198  | H                      | -2.80753 | -0.51566 | 0.33069  |
| H | 2.78886  | 0.31198  | 0.11351  | N                      | -4.50792 | 2.10171  | 0.65420  |
| C | 2.23266  | 0.91017  | -4.09490 | H                      | -2.67552 | 1.78560  | -0.37499 |
| C | 2.38030  | 1.50783  | -5.37860 | H                      | -2.50014 | 2.29924  | 1.32065  |
| C | 1.19884  | -0.04270 | -3.89167 | C                      | -5.27697 | 1.09976  | 1.04856  |
| C | 1.58455  | 1.05297  | -6.43994 | C                      | -5.18376 | -1.29056 | 1.76861  |
| C | 0.44026  | -0.47831 | -4.99063 | H                      | -6.26737 | -1.19313 | 1.86963  |
| C | 0.64287  | 0.04087  | -6.26560 | H                      | -4.75336 | -1.56742 | 2.73756  |
| H | 1.70849  | 1.50297  | -7.42243 | H                      | -4.95686 | -2.07439 | 1.03701  |
| H | -0.34266 | -1.21685 | -4.83441 | C                      | -4.93318 | 3.45503  | 0.29012  |
| H | 0.05099  | -0.31403 | -7.10701 | H                      | -6.01972 | 3.53080  | 0.37735  |
| C | 3.31830  | 2.67669  | -5.64479 | H                      | -4.63686 | 3.67166  | -0.74239 |
| H | 3.90071  | 2.83586  | -4.74246 | H                      | -4.46406 | 4.18488  | 0.95967  |
| C | 2.50597  | 3.97326  | -5.86754 | H                      | -6.35565 | 1.18526  | 1.14019  |
| C | 4.28973  | 2.42893  | -6.81763 |                        |          |          |          |
| H | 4.85741  | 1.50226  | -6.68008 | <b>Et<sup>11</sup></b> |          |          |          |
| H | 3.76064  | 2.35725  | -7.77611 | C                      | -3.07689 | 0.10361  | 0.99041  |
| H | 5.00383  | 3.25890  | -6.89757 | C                      | -2.93519 | 1.60433  | 0.59859  |
| H | 1.88997  | 3.90806  | -6.77374 | N                      | -4.52179 | -0.01545 | 1.34129  |
| H | 3.18059  | 4.83276  | -5.97585 | H                      | -2.46644 | -0.17065 | 1.85687  |
| H | 1.84512  | 4.15958  | -5.01492 | H                      | -2.83819 | -0.57133 | 0.16354  |
| C | 0.74986  | -0.49082 | -2.50462 | N                      | -4.32600 | 2.12209  | 0.74918  |
| H | 1.48911  | -0.13052 | -1.79033 | H                      | -2.60226 | 1.74583  | -0.43472 |
| C | 0.61189  | -2.01905 | -2.34282 | H                      | -2.26081 | 2.15097  | 1.26390  |
| C | -0.59762 | 0.19467  | -2.17394 | C                      | -5.12149 | 1.15143  | 1.16877  |
| H | -0.51884 | 1.28212  | -2.26443 | C                      | -5.15265 | -1.27661 | 1.77823  |
| H | -1.38036 | -0.14316 | -2.86397 | H                      | -6.15987 | -1.02531 | 2.12729  |
| H | -0.92038 | -0.04254 | -1.15393 | H                      | -4.58639 | -1.64319 | 2.64388  |
| H | -0.18450 | -2.41794 | -2.98255 | C                      | -4.70486 | 3.52570  | 0.49288  |
| H | 0.35043  | -2.26812 | -1.30603 | H                      | -5.79896 | 3.56995  | 0.51483  |
| H | 1.53768  | -2.54463 | -2.59529 | H                      | -4.38621 | 3.76971  | -0.52852 |
| C | 5.73815  | 3.00061  | 0.55705  | C                      | -4.09433 | 4.50097  | 1.50543  |

|   |          |          |          |
|---|----------|----------|----------|
| H | -4.41520 | 4.26379  | 2.52582  |
| H | -2.99961 | 4.49309  | 1.46869  |
| H | -4.42467 | 5.51800  | 1.26888  |
| C | -5.20204 | -2.33267 | 0.66851  |
| H | -4.19883 | -2.62016 | 0.33576  |
| H | -5.69300 | -3.23363 | 1.05147  |
| H | -5.77097 | -1.97196 | -0.19556 |
| H | -6.18068 | 1.30033  | 1.35618  |

**Me<sub>12</sub>**

|   |          |          |          |
|---|----------|----------|----------|
| C | -2.90710 | 1.93945  | -0.51536 |
| C | -3.10331 | 0.89183  | 0.41107  |
| C | -2.03231 | 0.15907  | 0.92580  |
| C | -0.75745 | 0.51671  | 0.47643  |
| C | -0.56071 | 1.55985  | -0.44920 |
| C | -1.63359 | 2.29460  | -0.96375 |
| H | -1.49072 | 3.10507  | -1.67151 |
| H | -3.77000 | 2.48467  | -0.88730 |
| H | -4.11289 | 0.65127  | 0.73198  |
| H | -2.18871 | -0.64480 | 1.63848  |
| N | 0.82077  | 1.63792  | -0.67823 |
| N | 0.51440  | 0.00711  | 0.77593  |
| C | 1.45520  | 0.69657  | 0.06959  |
| C | 2.96031  | 0.49572  | 0.21889  |
| N | 3.63300  | 1.53957  | 1.01030  |
| N | 3.63209  | 0.50892  | -1.08535 |
| H | 3.09058  | -0.47858 | 0.72631  |
| C | 4.92290  | 1.20860  | -0.89228 |
| C | 4.55266  | 2.27872  | 0.13078  |
| H | 5.27401  | 1.61807  | -1.84500 |
| H | 5.69808  | 0.53524  | -0.48762 |
| H | 4.08223  | 3.15366  | -0.35260 |
| H | 5.41440  | 2.63185  | 0.70772  |
| C | 1.43300  | 2.62155  | -1.58891 |
| H | 0.78303  | 2.73228  | -2.46027 |
| H | 2.40667  | 2.24129  | -1.89534 |
| H | 1.53155  | 3.58602  | -1.08145 |
| C | 0.71537  | -1.08998 | 1.73617  |
| H | 0.36182  | -0.77471 | 2.72290  |
| H | 1.76989  | -1.35090 | 1.79923  |
| H | 0.14560  | -1.96377 | 1.40630  |
| C | 3.71299  | -0.80005 | -1.73888 |
| H | 2.70600  | -1.20460 | -1.89497 |
| H | 4.30117  | -1.52977 | -1.15228 |
| H | 4.18229  | -0.68331 | -2.72036 |
| C | 2.87066  | 2.30379  | 1.98975  |
| H | 2.33411  | 1.62807  | 2.66598  |
| H | 2.14003  | 3.00649  | 1.54397  |
| H | 3.56820  | 2.88856  | 2.59779  |

**TS<sup>Me</sup><sub>12</sub>**

|   |          |          |          |
|---|----------|----------|----------|
| C | -3.08088 | 1.72060  | -0.95495 |
| C | -3.31301 | 0.83073  | 0.11430  |
| C | -2.25966 | 0.28362  | 0.85301  |
| C | -0.96682 | 0.65895  | 0.47770  |
| C | -0.73455 | 1.54547  | -0.59089 |
| C | -1.78685 | 2.09703  | -1.32699 |
| H | -1.61592 | 2.78771  | -2.14746 |
| H | -3.92852 | 2.12532  | -1.50103 |
| H | -4.33494 | 0.56608  | 0.37137  |
| H | -2.44496 | -0.39833 | 1.67774  |
| N | 0.66176  | 1.69175  | -0.67639 |
| N | 0.30205  | 0.32325  | 0.98226  |
| C | 1.28738  | 0.96088  | 0.28730  |
| C | 3.33747  | 0.37359  | 0.31049  |
| N | 4.05510  | 1.23680  | 1.10907  |
| N | 3.80746  | 0.43978  | -0.97453 |
| H | 3.04823  | -0.59128 | 0.71481  |
| C | 4.87955  | 1.45527  | -1.06984 |
| C | 4.67356  | 2.25364  | 0.22888  |
| H | 4.77562  | 2.06627  | -1.97338 |
| H | 5.86294  | 0.96174  | -1.09219 |
| H | 3.98918  | 3.10589  | 0.08000  |
| H | 5.60509  | 2.62316  | 0.66468  |
| C | 1.31813  | 2.56690  | -1.65089 |
| H | 0.89216  | 2.39083  | -2.64355 |
| H | 2.38046  | 2.33479  | -1.67273 |
| H | 1.17068  | 3.61800  | -1.37916 |
| C | 0.49426  | -0.56786 | 2.12896  |
| H | 0.02227  | -0.13942 | 3.01974  |
| H | 1.55911  | -0.69202 | 2.32218  |
| H | 0.04738  | -1.54619 | 1.92261  |
| C | 3.74759  | -0.68418 | -1.90355 |
| H | 2.83945  | -1.26479 | -1.71461 |
| H | 4.62273  | -1.34480 | -1.80496 |
| H | 3.70608  | -0.31074 | -2.93235 |
| C | 3.55158  | 1.65213  | 2.41165  |
| H | 3.30366  | 0.77400  | 3.01522  |
| H | 2.65139  | 2.28216  | 2.30889  |
| H | 4.32998  | 2.21534  | 2.93333  |

**Et<sub>12</sub>**

|   |          |          |          |
|---|----------|----------|----------|
| C | -3.00418 | 2.10637  | -0.33921 |
| C | -3.19367 | 1.03022  | 0.55579  |
| C | -2.12097 | 0.27143  | 1.02554  |
| C | -0.84898 | 0.62901  | 0.56572  |
| C | -0.65981 | 1.69929  | -0.33240 |
| C | -1.73601 | 2.46113  | -0.80070 |
| H | -1.59877 | 3.28890  | -1.48901 |
| H | -3.86816 | 2.67155  | -0.67738 |
| H | -4.19953 | 0.78769  | 0.88685  |
| H | -2.27515 | -0.55501 | 1.71237  |
| N | 0.71923  | 1.78093  | -0.57757 |

|   |          |          |          |   |          |          |          |
|---|----------|----------|----------|---|----------|----------|----------|
| N | 0.42522  | 0.10836  | 0.83400  | N | 0.59570  | 1.67524  | -0.71046 |
| C | 1.35404  | 0.80791  | 0.12499  | N | 0.26399  | 0.30908  | 0.95885  |
| C | 2.84976  | 0.55727  | 0.22092  | C | 1.22891  | 1.00487  | 0.29102  |
| N | 3.59431  | 1.55381  | 1.01858  | C | 3.26561  | 0.43791  | 0.29279  |
| N | 3.47566  | 0.56712  | -1.10863 | N | 4.01572  | 1.32032  | 1.04395  |
| H | 2.95791  | -0.43408 | 0.70239  | N | 3.69724  | 0.45625  | -1.00567 |
| C | 4.83490  | 1.11749  | -0.91003 | H | 2.99096  | -0.51267 | 0.74008  |
| C | 4.59570  | 2.19116  | 0.14713  | C | 4.76497  | 1.46426  | -1.17247 |
| H | 5.22536  | 1.52315  | -1.84698 | C | 4.60838  | 2.30430  | 0.10744  |
| H | 5.53750  | 0.35178  | -0.53463 | H | 4.62622  | 2.04851  | -2.08927 |
| H | 4.22954  | 3.13056  | -0.30825 | H | 5.74977  | 0.97774  | -1.21399 |
| H | 5.50273  | 2.42536  | 0.71287  | H | 3.92298  | 3.15511  | -0.04434 |
| C | 1.31692  | 2.76511  | -1.51291 | H | 5.55885  | 2.68271  | 0.48728  |
| H | 2.37603  | 2.83654  | -1.27943 | C | 1.23694  | 2.61608  | -1.64520 |
| H | 0.84507  | 3.72794  | -1.28935 | H | 0.74061  | 2.50175  | -2.61512 |
| C | 0.66623  | -1.05411 | 1.72253  | H | 2.27061  | 2.29090  | -1.76596 |
| H | -0.09621 | -1.00218 | 2.50543  | C | 0.47286  | -0.49908 | 2.17377  |
| H | 1.63434  | -0.91498 | 2.20883  | H | 1.52545  | -0.79129 | 2.20299  |
| C | 3.40123  | -0.73650 | -1.79215 | H | -0.11621 | -1.41702 | 2.06548  |
| H | 2.34170  | -1.02699 | -1.82898 | C | 3.52701  | -0.67767 | -1.92050 |
| H | 3.92835  | -1.51248 | -1.20142 | H | 2.52618  | -1.09123 | -1.74257 |
| C | 2.86422  | 2.41401  | 1.95708  | H | 3.52454  | -0.27938 | -2.94282 |
| H | 2.12863  | 1.79167  | 2.48280  | C | 3.52098  | 1.77499  | 2.34710  |
| H | 2.29656  | 3.20735  | 1.42927  | H | 3.15249  | 0.89049  | 2.87891  |
| C | 3.96626  | -0.69151 | -3.21292 | H | 2.65376  | 2.44324  | 2.19024  |
| H | 5.04268  | -0.48969 | -3.21445 | C | 0.08464  | 0.25512  | 3.45103  |
| H | 3.81146  | -1.65727 | -3.70596 | H | -0.97072 | 0.54541  | 3.43427  |
| H | 3.47140  | 0.08252  | -3.81060 | H | 0.24884  | -0.38463 | 4.32514  |
| C | 3.79733  | 3.05934  | 2.98665  | H | 0.68695  | 1.16237  | 3.56615  |
| H | 3.21164  | 3.63407  | 3.71273  | C | 1.15574  | 4.06590  | -1.15485 |
| H | 4.36805  | 2.29386  | 3.52391  | H | 1.63346  | 4.73440  | -1.87979 |
| H | 4.50462  | 3.74949  | 2.51400  | H | 0.11541  | 4.38482  | -1.03056 |
| C | 0.59830  | -2.38454 | 0.96722  | H | 1.66484  | 4.17949  | -0.19112 |
| H | 1.38946  | -2.44971 | 0.21252  | C | 4.59818  | -1.76962 | -1.77215 |
| H | 0.72798  | -3.21308 | 1.67175  | H | 4.59941  | -2.18654 | -0.75798 |
| H | -0.36895 | -2.50637 | 0.46827  | H | 4.40141  | -2.58660 | -2.47555 |
| C | 1.11155  | 2.36065  | -2.97439 | H | 5.60001  | -1.38031 | -1.98463 |
| H | 1.53513  | 3.13256  | -3.62611 | C | 4.59957  | 2.46800  | 3.18127  |
| H | 1.62382  | 1.41663  | -3.17927 | H | 4.19442  | 2.72258  | 4.16638  |
| H | 0.05080  | 2.25070  | -3.22145 | H | 5.46627  | 1.81319  | 3.32410  |
|   |          |          |          | H | 4.93929  | 3.39984  | 2.71615  |

**TS<sup>Et</sup>12**

|   |          |          |          |
|---|----------|----------|----------|
| C | -3.12608 | 1.43539  | -1.14295 |
| C | -3.34037 | 0.54669  | -0.06869 |
| C | -2.28410 | 0.09082  | 0.72448  |
| C | -1.00459 | 0.55393  | 0.40171  |
| C | -0.79018 | 1.43828  | -0.67326 |
| C | -1.84749 | 1.89854  | -1.46431 |
| H | -1.69086 | 2.58436  | -2.29161 |
| H | -3.97528 | 1.76849  | -1.73322 |
| H | -4.35057 | 0.21068  | 0.14836  |
| H | -2.45791 | -0.59172 | 1.55097  |

**Me<sup>13</sup>**

|   |          |          |          |
|---|----------|----------|----------|
| C | -0.61820 | -1.54180 | -0.24707 |
| C | 0.29617  | -2.58247 | -0.42460 |
| C | -0.20456 | -0.28745 | 0.25120  |
| C | 1.14293  | -0.12137 | 0.55894  |
| C | 2.05891  | -1.18891 | 0.42366  |
| C | 1.65773  | -2.41925 | -0.08951 |
| N | 1.84604  | 1.00275  | 1.02576  |
| N | 3.31474  | -0.74876 | 0.87652  |
| C | 3.20379  | 0.62478  | 1.24378  |

|                                     |          |          |          |                        |          |          |          |
|-------------------------------------|----------|----------|----------|------------------------|----------|----------|----------|
| C                                   | 4.20317  | 1.42277  | 1.71296  | H                      | 2.96050  | 4.33589  | 1.60756  |
| N                                   | 4.13474  | 2.86281  | 1.76025  | C                      | 4.47348  | -0.28301 | 3.32633  |
| N                                   | 5.45962  | 0.93128  | 2.22323  | H                      | 3.45579  | -0.57878 | 3.06050  |
| C                                   | 6.31847  | 2.13235  | 2.35952  | H                      | 4.51755  | -0.12298 | 4.41815  |
| C                                   | 5.30193  | 3.27929  | 2.57450  | H                      | 5.16014  | -1.10357 | 3.07506  |
| H                                   | 6.88665  | 2.28670  | 1.43175  | C                      | 4.72034  | -0.54035 | -0.15999 |
| H                                   | 7.02634  | 2.00850  | 3.18427  | H                      | 5.32110  | 0.35669  | -0.32276 |
| H                                   | 5.66639  | 4.25924  | 2.25282  | H                      | 4.70549  | -1.13749 | -1.08112 |
| H                                   | 5.00952  | 3.34520  | 3.63164  | H                      | 5.17733  | -1.13819 | 0.63981  |
| C                                   | 4.06073  | 3.51049  | 0.43334  | C                      | 0.89557  | 2.27313  | 1.12310  |
| H                                   | 4.95373  | 3.32257  | -0.19057 | H                      | 1.29778  | 2.52859  | 2.11763  |
| H                                   | 3.93677  | 4.59157  | 0.56602  | H                      | -0.16405 | 2.01960  | 1.20368  |
| H                                   | 3.18744  | 3.12730  | -0.10332 | H                      | 1.00561  | 3.13816  | 0.46160  |
| C                                   | 5.34037  | 0.12938  | 3.45949  | H                      | -0.98883 | -0.10644 | 0.87254  |
| H                                   | 4.67258  | -0.71736 | 3.27345  | H                      | -1.23132 | -2.56564 | 0.57003  |
| H                                   | 4.93253  | 0.70444  | 4.31095  | H                      | 0.73036  | -3.98812 | 0.06526  |
| H                                   | 6.32712  | -0.26312 | 3.73146  | H                      | 3.01399  | -2.98998 | -0.13197 |
| C                                   | 4.54467  | -1.31182 | 0.32229  |                        |          |          |          |
| H                                   | 5.40321  | -0.91917 | 0.87105  | <b>Et<sup>13</sup></b> |          |          |          |
| H                                   | 4.65637  | -1.04990 | -0.74256 | C                      | -0.67055 | -1.57136 | -0.33749 |
| H                                   | 4.51664  | -2.40180 | 0.41692  | C                      | 0.25113  | -2.59051 | -0.58112 |
| C                                   | 1.17598  | 2.01270  | 1.84306  | C                      | -0.26054 | -0.34115 | 0.22235  |
| H                                   | 1.85654  | 2.84871  | 2.01724  | C                      | 1.08760  | -0.18086 | 0.53040  |
| H                                   | 0.87124  | 1.59655  | 2.81720  | C                      | 2.01258  | -1.23289 | 0.33381  |
| H                                   | 0.28497  | 2.36909  | 1.31686  | C                      | 1.61392  | -2.43704 | -0.24415 |
| H                                   | -0.91792 | 0.52271  | 0.37553  | N                      | 1.77904  | 0.91936  | 1.06584  |
| H                                   | -1.66510 | -1.69350 | -0.49870 | N                      | 3.26745  | -0.80131 | 0.79019  |
| H                                   | -0.04134 | -3.53630 | -0.82288 | C                      | 3.15218  | 0.55443  | 1.21969  |
| H                                   | 2.36245  | -3.23631 | -0.21791 | C                      | 4.14351  | 1.37621  | 1.66608  |
|                                     |          |          |          | N                      | 4.03965  | 2.80988  | 1.65854  |
| <b>TS<sup>Me</sup><sub>13</sub></b> |          |          |          | N                      | 5.42022  | 0.93585  | 2.18431  |
| C                                   | -0.24787 | -2.10962 | 0.48315  | C                      | 6.22702  | 2.17124  | 2.36448  |
| C                                   | 0.86487  | -2.91734 | 0.19857  | C                      | 5.16583  | 3.29326  | 2.48340  |
| C                                   | -0.11894 | -0.72146 | 0.65756  | H                      | 6.87347  | 2.32975  | 1.49299  |
| C                                   | 1.15803  | -0.16702 | 0.53999  | H                      | 6.86269  | 2.08698  | 3.25055  |
| C                                   | 2.28041  | -0.98563 | 0.25917  | H                      | 5.51806  | 4.26686  | 2.12955  |
| C                                   | 2.15172  | -2.36403 | 0.08331  | H                      | 4.83942  | 3.40290  | 3.52769  |
| N                                   | 1.63884  | 1.14171  | 0.60480  | C                      | 3.91695  | 3.42161  | 0.31082  |
| N                                   | 3.37444  | -0.12357 | 0.18803  | H                      | 3.75029  | 4.49688  | 0.45817  |
| C                                   | 3.03055  | 1.19686  | 0.47813  | H                      | 3.00402  | 3.01688  | -0.13857 |
| C                                   | 3.87166  | 1.82621  | 2.18387  | C                      | 5.32985  | 0.09580  | 3.40546  |
| N                                   | 4.53404  | 3.02890  | 2.04168  | H                      | 4.51161  | -0.61270 | 3.24553  |
| N                                   | 4.82111  | 0.91903  | 2.59131  | H                      | 5.04936  | 0.70708  | 4.28540  |
| C                                   | 6.16453  | 1.51563  | 2.74366  | C                      | 4.51381  | -1.37505 | 0.26420  |
| C                                   | 5.99938  | 2.80941  | 1.93933  | H                      | 5.29956  | -0.63136 | 0.41416  |
| H                                   | 6.95218  | 0.85903  | 2.35074  | H                      | 4.39164  | -1.53367 | -0.81856 |
| H                                   | 6.38019  | 1.71828  | 3.80734  | C                      | 1.10684  | 1.83025  | 2.01179  |
| H                                   | 6.28723  | 2.66107  | 0.88106  | H                      | 1.86688  | 2.18829  | 2.70970  |
| H                                   | 6.56394  | 3.65668  | 2.34300  | H                      | 0.36954  | 1.23987  | 2.57690  |
| C                                   | 3.95719  | 4.08636  | 1.23340  | H                      | -0.97682 | 0.45862  | 0.38582  |
| H                                   | 3.86283  | 3.76273  | 0.18009  | H                      | -1.71828 | -1.71722 | -0.58906 |
| H                                   | 4.58620  | 4.98117  | 1.29494  | H                      | -0.08054 | -3.52338 | -1.03086 |

|   |          |          |          |
|---|----------|----------|----------|
| H | 2.31779  | -3.24478 | -0.41815 |
| C | 0.41419  | 3.02128  | 1.33832  |
| H | 1.14156  | 3.66871  | 0.84025  |
| H | -0.31808 | 2.69193  | 0.59300  |
| H | -0.11493 | 3.61766  | 2.09278  |
| C | 4.90677  | -2.69292 | 0.94731  |
| H | 4.14252  | -3.46508 | 0.81326  |
| H | 5.84611  | -3.06828 | 0.52181  |
| H | 5.05107  | -2.54712 | 2.02229  |
| C | 6.62870  | -0.66547 | 3.68500  |
| H | 6.50539  | -1.31761 | 4.55889  |
| H | 6.90745  | -1.28391 | 2.82442  |
| H | 7.46373  | 0.01373  | 3.89392  |
| C | 5.09564  | 3.18990  | -0.65272 |
| H | 6.01601  | 3.66941  | -0.29774 |
| H | 5.28762  | 2.11728  | -0.77237 |
| H | 4.86324  | 3.60600  | -1.64149 |

|   |          |          |          |
|---|----------|----------|----------|
| H | 3.01384  | -3.23272 | 0.12753  |
| C | 0.25176  | 2.89858  | 0.37183  |
| H | 1.10074  | 3.27698  | -0.20658 |
| H | -0.42702 | 2.38041  | -0.31638 |
| H | -0.28285 | 3.75324  | 0.80574  |
| C | 4.58275  | -0.82337 | -1.63968 |
| H | 5.58233  | -1.08450 | -2.00925 |
| H | 3.88232  | -1.60172 | -1.96333 |
| H | 4.27792  | 0.12517  | -2.09599 |
| C | 4.61150  | -0.05956 | 4.91197  |
| H | 3.82600  | 0.66350  | 5.15968  |
| H | 4.40466  | -0.99730 | 5.44319  |
| H | 5.56875  | 0.33047  | 5.27921  |
| C | 4.39428  | 5.34378  | 1.17569  |
| H | 4.46069  | 5.70968  | 2.20787  |
| H | 5.40061  | 5.36089  | 0.74044  |
| H | 3.77717  | 6.04483  | 0.60101  |

**TS<sup>Et</sup>13**

|   |          |          |          |
|---|----------|----------|----------|
| C | -0.22807 | -2.48463 | 0.97608  |
| C | 0.89509  | -3.24619 | 0.61622  |
| C | -0.14481 | -1.09129 | 1.13825  |
| C | 1.09799  | -0.48689 | 0.93094  |
| C | 2.23120  | -1.25692 | 0.57165  |
| C | 2.14677  | -2.64046 | 0.40828  |
| N | 1.52444  | 0.83938  | 0.96914  |
| N | 3.28015  | -0.34603 | 0.42633  |
| C | 2.89271  | 0.96355  | 0.70699  |
| C | 3.86614  | 1.75893  | 2.24640  |
| N | 4.47125  | 2.97464  | 1.95786  |
| N | 4.88283  | 0.91396  | 2.61638  |
| C | 6.21729  | 1.54530  | 2.56868  |
| C | 5.92368  | 2.77498  | 1.70333  |
| H | 6.97098  | 0.87713  | 2.12922  |
| H | 6.55794  | 1.83363  | 3.57634  |
| H | 6.09277  | 2.56148  | 0.62989  |
| H | 6.51496  | 3.65083  | 1.98397  |
| C | 3.76968  | 3.94541  | 1.12915  |
| H | 3.71973  | 3.56867  | 0.08894  |
| H | 2.74056  | 3.99380  | 1.49543  |
| C | 4.64285  | -0.29643 | 3.39157  |
| H | 3.68442  | -0.70903 | 3.06070  |
| H | 5.42053  | -1.03272 | 3.13862  |
| C | 4.59360  | -0.68958 | -0.10998 |
| H | 5.27896  | 0.10098  | 0.20273  |
| H | 4.92957  | -1.62363 | 0.36015  |
| C | 0.73639  | 1.95272  | 1.47739  |
| H | -0.11581 | 1.54018  | 2.02967  |
| H | 1.37843  | 2.47272  | 2.20459  |
| H | -1.02201 | -0.50852 | 1.40679  |
| H | -1.18435 | -2.98017 | 1.12659  |
| H | 0.79581  | -4.32164 | 0.48963  |

**Me<sup>14</sup>**

|   |          |          |          |
|---|----------|----------|----------|
| C | -4.08519 | 9.39480  | -0.03172 |
| C | -3.37679 | 8.01492  | 0.07536  |
| C | -5.55065 | 9.21503  | 0.48329  |
| H | -4.06323 | 9.76693  | -1.05891 |
| H | -3.56469 | 10.12373 | 0.59704  |
| N | -4.35645 | 7.26524  | 1.02938  |
| C | -5.46133 | 7.90611  | 1.19466  |
| C | -5.98209 | 10.33412 | 1.46216  |
| H | -5.29597 | 10.40824 | 2.31313  |
| H | -6.99519 | 10.16204 | 1.84258  |
| H | -5.97692 | 11.29413 | 0.93429  |
| C | -6.59223 | 9.08676  | -0.66570 |
| H | -6.31266 | 8.31040  | -1.38476 |
| H | -6.64912 | 10.04355 | -1.19599 |
| H | -7.58881 | 8.85509  | -0.27396 |
| C | -3.31408 | 7.25884  | -1.26053 |
| H | -4.28455 | 7.21587  | -1.76102 |
| H | -2.93866 | 6.24087  | -1.12361 |
| H | -2.61739 | 7.78912  | -1.91793 |
| C | -1.97742 | 8.09521  | 0.69031  |
| H | -1.96658 | 8.66998  | 1.61862  |
| H | -1.32045 | 8.60008  | -0.02584 |
| H | -1.56577 | 7.09908  | 0.87992  |
| H | -6.25049 | 7.47464  | 1.80875  |
| C | -4.07175 | 5.95927  | 1.62371  |
| C | -4.49524 | 4.79609  | 0.94322  |
| C | -3.40102 | 5.93296  | 2.86701  |
| C | -4.12760 | 3.56545  | 1.50904  |
| C | -3.06672 | 4.67140  | 3.37971  |
| C | -3.40230 | 3.50169  | 2.69787  |
| H | -4.43028 | 2.64533  | 1.01765  |
| H | -2.55149 | 4.60532  | 4.33348  |
| H | -3.12395 | 2.53539  | 3.11103  |



|                        |          |          |          |                        |          |          |          |
|------------------------|----------|----------|----------|------------------------|----------|----------|----------|
| C                      | -5.41718 | 4.81871  | -0.27410 | H                      | -3.90296 | 1.64192  | -0.08069 |
| H                      | -5.46407 | 5.84008  | -0.66123 | C                      | -4.49172 | 5.47952  | 2.54645  |
| C                      | -6.85526 | 4.43471  | 0.15426  | H                      | -5.08765 | 6.39558  | 2.49069  |
| C                      | -4.92403 | 3.91628  | -1.42419 | C                      | -3.01102 | 5.91778  | 2.66608  |
| H                      | -3.89885 | 4.16271  | -1.72142 | C                      | -4.94766 | 4.71289  | 3.80444  |
| H                      | -4.94550 | 2.85802  | -1.14247 | H                      | -5.98612 | 4.37538  | 3.71663  |
| H                      | -5.57261 | 4.03546  | -2.29940 | H                      | -4.32269 | 3.83248  | 3.98884  |
| H                      | -6.88870 | 3.40944  | 0.53957  | H                      | -4.86934 | 5.35888  | 4.68623  |
| H                      | -7.53773 | 4.49909  | -0.70111 | H                      | -2.34983 | 5.04630  | 2.73201  |
| H                      | -7.23061 | 5.09639  | 0.94494  | H                      | -2.86415 | 6.52658  | 3.56579  |
| C                      | -3.15982 | 7.18365  | 3.71011  | H                      | -2.69413 | 6.50712  | 1.79629  |
| H                      | -3.30144 | 8.06560  | 3.07771  | C                      | -5.52778 | 5.31173  | -2.49568 |
| C                      | -1.73320 | 7.25966  | 4.29114  | H                      | -6.02365 | 6.25972  | -2.27141 |
| C                      | -4.22376 | 7.26409  | 4.83291  | C                      | -6.48432 | 4.49399  | -3.38787 |
| H                      | -5.24210 | 7.25877  | 4.42418  | C                      | -4.22183 | 5.65791  | -3.25303 |
| H                      | -4.13754 | 6.40999  | 5.51410  | H                      | -3.55294 | 6.27507  | -2.64022 |
| H                      | -4.09275 | 8.18167  | 5.41812  | H                      | -3.67401 | 4.74891  | -3.52592 |
| H                      | -1.55286 | 6.46322  | 5.02112  | H                      | -4.44947 | 6.20751  | -4.17378 |
| H                      | -1.58936 | 8.21492  | 4.80854  | H                      | -6.01524 | 3.56817  | -3.73814 |
| H                      | -0.97266 | 7.17512  | 3.50736  | H                      | -6.76139 | 5.07633  | -4.27390 |
| <b>Et<sup>14</sup></b> |          |          |          | H                      | -7.40250 | 4.22315  | -2.85515 |
| C                      | -7.21227 | 8.44782  | 0.67900  | C                      | -3.75923 | 10.44869 | 0.64302  |
| C                      | -7.26284 | 6.90559  | 0.48630  | H                      | -3.03758 | 9.64508  | 0.45028  |
| C                      | -5.85319 | 8.95754  | 0.09598  | H                      | -3.83535 | 11.05677 | -0.26426 |
| H                      | -7.26556 | 8.68734  | 1.74555  | H                      | -3.33147 | 11.08244 | 1.42703  |
| H                      | -8.06505 | 8.92622  | 0.19278  | C                      | -6.72837 | 10.94022 | -1.34744 |
| N                      | -5.77078 | 6.60924  | 0.16054  | H                      | -7.72568 | 10.87174 | -0.89819 |
| C                      | -5.09242 | 7.68565  | -0.04586 | H                      | -6.16881 | 11.71395 | -0.81245 |
| C                      | -5.99845 | 9.58881  | -1.33402 | H                      | -6.85430 | 11.27852 | -2.38150 |
| H                      | -6.53600 | 8.87471  | -1.97065 | <b>Me<sup>15</sup></b> |          |          |          |
| H                      | -5.00163 | 9.70439  | -1.77703 | C                      | -3.20242 | 0.14700  | 0.99264  |
| C                      | -5.12420 | 9.91125  | 1.09579  | C                      | -3.10171 | 1.62031  | 0.55934  |
| H                      | -5.01513 | 9.37827  | 2.05015  | N                      | -4.66581 | 0.00889  | 1.25097  |
| H                      | -5.80807 | 10.74553 | 1.29381  | H                      | -2.63390 | -0.06169 | 1.91184  |
| C                      | -7.70120 | 6.14949  | 1.74379  | H                      | -2.86986 | -0.55666 | 0.21956  |
| H                      | -7.14628 | 6.46538  | 2.62962  | N                      | -4.45759 | 2.13214  | 0.91490  |
| H                      | -7.59226 | 5.06764  | 1.61915  | H                      | -2.92505 | 1.73153  | -0.52196 |
| H                      | -8.76116 | 6.36359  | 1.91687  | H                      | -2.31861 | 2.17547  | 1.09031  |
| C                      | -8.12922 | 6.47318  | -0.70648 | C                      | -5.34952 | 1.17457  | 1.25300  |
| H                      | -7.88401 | 7.02319  | -1.61849 | C                      | -5.20472 | -1.26031 | 1.70183  |
| H                      | -9.17555 | 6.67902  | -0.45811 | H                      | -6.28052 | -1.14176 | 1.84874  |
| H                      | -8.03416 | 5.40101  | -0.90018 | H                      | -4.74561 | -1.57702 | 2.65293  |
| H                      | -4.04126 | 7.61124  | -0.31594 | H                      | -5.02398 | -2.04990 | 0.95736  |
| C                      | -5.20808 | 5.26238  | 0.07267  | C                      | -4.80082 | 3.51646  | 0.64905  |
| C                      | -4.68726 | 4.68864  | 1.25422  | H                      | -5.83619 | 3.67670  | 0.95774  |
| C                      | -5.18846 | 4.61285  | -1.18104 | H                      | -4.70476 | 3.75550  | -0.42299 |
| C                      | -4.22379 | 3.36812  | 1.16651  | H                      | -4.14435 | 4.19844  | 1.20980  |
| C                      | -4.71292 | 3.29249  | -1.20080 | <b>Et<sup>15</sup></b> |          |          |          |
| C                      | -4.25934 | 2.66821  | -0.03970 | C                      | -3.09502 | 0.13263  | 1.05588  |
| H                      | -3.81528 | 2.88844  | 2.05113  |                        |          |          |          |
| H                      | -4.68232 | 2.75447  | -2.14385 |                        |          |          |          |

|   |          |          |          |   |          |          |          |
|---|----------|----------|----------|---|----------|----------|----------|
| C | -2.97746 | 1.58503  | 0.55958  | C | -4.68627 | 3.49755  | 0.53906  |
| N | -4.56790 | 0.00315  | 1.26601  | H | -5.77647 | 3.56438  | 0.60045  |
| H | -2.56340 | -0.03271 | 2.00573  | H | -4.39456 | 3.72527  | -0.50042 |
| H | -2.72598 | -0.59783 | 0.32776  | C | -4.03038 | 4.50551  | 1.49623  |
| N | -4.34641 | 2.11221  | 0.83972  | H | -4.33994 | 4.30739  | 2.52903  |
| H | -2.76403 | 1.64617  | -0.51884 | H | -2.93537 | 4.45636  | 1.44978  |
| H | -2.20886 | 2.15616  | 1.09147  | H | -4.32787 | 5.52844  | 1.23352  |
| C | -5.24817 | 1.16792  | 1.18803  | C | -5.15127 | -2.34587 | 0.63335  |
| C | -5.14788 | -1.25588 | 1.71707  | H | -4.13496 | -2.59110 | 0.30080  |
| H | -6.17011 | -1.02610 | 2.03180  | H | -5.60486 | -3.26663 | 1.02121  |
| H | -4.59605 | -1.61179 | 2.60362  | H | -5.72762 | -2.01437 | -0.23823 |

## 6. References

1. Y. Shen, Q. Zheng, Z. N. Chen, D. Wen, J. H. Clark, X. Xu and T. Tu, Highly Efficient and Selective *N*-Formylation of Amines with CO<sub>2</sub> and H<sub>2</sub> Catalyzed by Porous Organometallic Polymers, *Angew. Chem. Int. Ed.*, 2021, **60**, 4125-4132.
2. D. Munz, J. Chu, M. Melaimi and G. Bertrand, NHC-CAAC Heterodimers with Three Stable Oxidation States, *Angew. Chem. Int. Ed.*, 2016, **55**, 12886-12890.
3. R. Jazzar, R. D. Dewhurst, J.-B. Bourg, B. Donnadiou, Y. Canac and G. Bertrand, Intramolecular "Hydroiminiumation" of Alkenes: Application to the Synthesis of Conjugate Acids of Cyclic Alkyl Amino Carbenes (CAACs), *Angew. Chem. Int. Ed.*, 2007, **46**, 2899-2902.
4. R. Jazzar, J.-B. Bourg, R. D. Dewhurst, B. Donnadiou and G. Bertrand, Intramolecular "Hydroiminiumation and -amidiniumation" of Alkenes: A Convenient, Flexible, and Scalable Route to Cyclic Iminium and Imidazolium Salts, *J. Org. Chem.*, 2007, **72**, 3492-3499.
5. F. Hanasaka, K. Fujita and R. Yamaguchi, Synthesis of New Cationic Cp\*Ir *N*-Heterocyclic Carbene Complexes and Their High Catalytic Activities in the Oppenauer-Type Oxidation of Primary and Secondary Alcohols, *Organometallics*, 2005, **24**, 3422-3433.
6. J. A. V. Er, A. G. Tennyson, J. W. Kamplain, V. M. Lynch and C. W. Bielawski, Synthesis and Study of 5,5'-Bibenzimidazolylidenes and Their Bimetallic Complexes, *Eur. J. Inorg. Chem.*, 2009, 1729-1738.
7. F. Neese, Software update: the ORCA program system, version 4.0, *Wiley Interdiscip. Rev. Comput. Mol. Sci.*, 2018, **8**, e1327-1321.
8. F. Neese, The ORCA program system, *Wiley Interdiscip. Rev. Comput. Mol. Sci.*, 2012, **2**, 73-78.
9. A. D. Becke, Density-functional exchange-energy approximation with correct asymptotic behavior, *Phys. Rev. A*, 1988, **38**, 3098-3100.
10. C. T. Lee, W. T. Yang and R. G. Parr, Development of the Colle-Salvetti Correlation-Energy Formula into a Functional of the Electron-Density, *Phys. Rev. B*, 1988, **37**, 785-789.
11. S. Grimme, S. Ehrlich and L. Goerigk, Effect of the Damping Function in Dispersion Corrected Density Functional Theory, *J. Comput. Chem.*, 2011, **32**, 1456-1465.
12. S. Grimme, J. Antony, S. Ehrlich and H. Krieg, A consistent and accurate ab initio parametrization of density functional dispersion correction (DFT-D) for the 94 elements H-Pu, *J. Chem. Phys.*, 2010, **132**, 154104.
13. F. Weigend and R. Ahlrichs, Balanced basis sets of split valence, triple zeta valence and quadruple zeta valence quality for H to Rn: Design and assessment of accuracy, *Phys. Chem. Chem. Phys.*, 2005, **7**, 3297-3305.
14. F. Weigend, Accurate Coulomb-fitting basis sets for H to Rn, *Phys. Chem. Chem. Phys.*, 2006, **8**, 1057-1065.
15. H. M. Sulzbach, E. Bolton, D. Lenoir, P. v. R. Schleyer and H. F. Schaefer, Tetra-*tert*-butylethylene: An Elusive Molecule with a Highly Twisted Double Bond. Can It Be Made by Carbene Dimerization?, *J. Am. Chem. Soc.*, 1996, **118**, 9908-9914.
16. M.-J. Cheng and C.-H. Hu, A computational study on the stability of diaminocarbenes, *Chem. Phys. Lett.*, 2000, **322**, 83-90.
17. A. D. Becke, Density-Functional Thermochemistry. 3. The Role of Exact Exchange, *J. Chem. Phys.*, 1993, **98**, 5648-5652.
18. C. Lee, W. Yang and R. G. Parr, Development of the Colle-Salvetti correlation-energy formula into a functional of the electron density, *Phys. Rev. B*, 1988, **37**, 785-789.
19. S. Grimme, J. G. Brandenburg, C. Bannwarth and A. Hansen, Consistent structures and interactions by density functional theory with small atomic orbital basis sets, *J. Chem. Phys.*, 2015, **143**, 054107.
20. F. Weigend, Hartree-Fock exchange fitting basis sets for H to Rn, *J. Comput. Chem.*, 2008, **29**, 167-175.
21. C. Riplinger and F. Neese, An efficient and near linear scaling pair natural orbital based local coupled cluster method, *J. Chem. Phys.*, 2013, **138**, 034106.
22. C. Riplinger, B. Sandhoefer, A. Hansen and F. Neese, Natural triple excitations in local coupled cluster calculations with pair natural orbitals, *J. Chem. Phys.*, 2013, **139**, 134101.
23. D. G. Liakos, M. Sparta, M. K. Kesharwani, J. M. L. Martin and F. Neese, Exploring the Accuracy Limits of Local Pair Natural Orbital Coupled-Cluster Theory, *J. Chem. Theory Comput.*, 2015, **11**, 1525-1539.
24. V. Barone and M. Cossi, Quantum Calculation of Molecular Energies and Energy Gradients in Solution by a Conductor Solvent Model, *J. Phys. Chem. A*, 1998, **102**, 1995-2001.
